# Supplementary material
Source: PubMed Central journal article supplement (PMC4294966)

**SRD5A1 by rs339331 in normal**

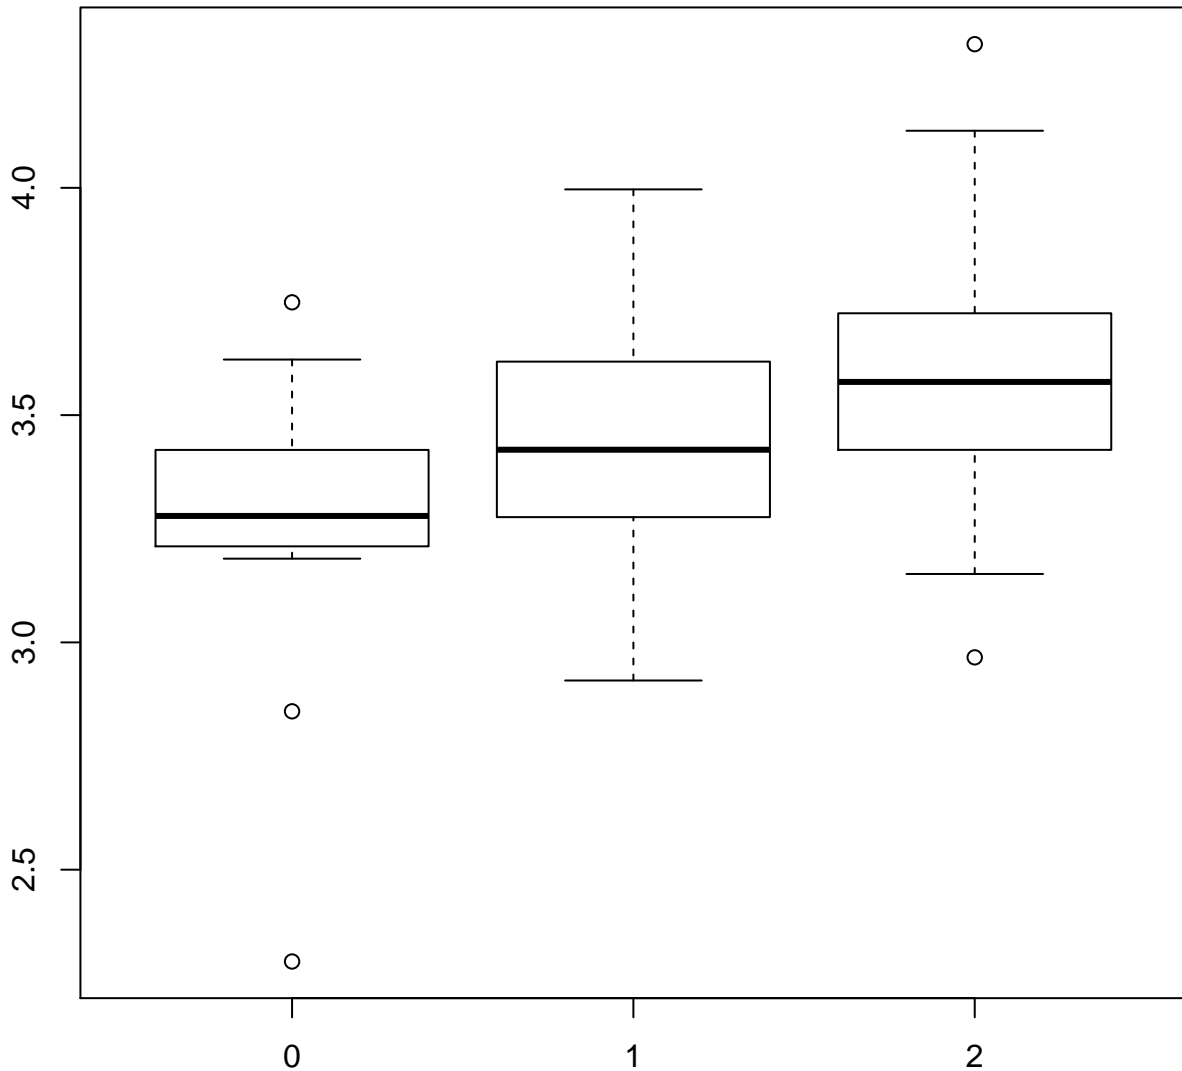

**KLHL33 by rs1571801 in normal**

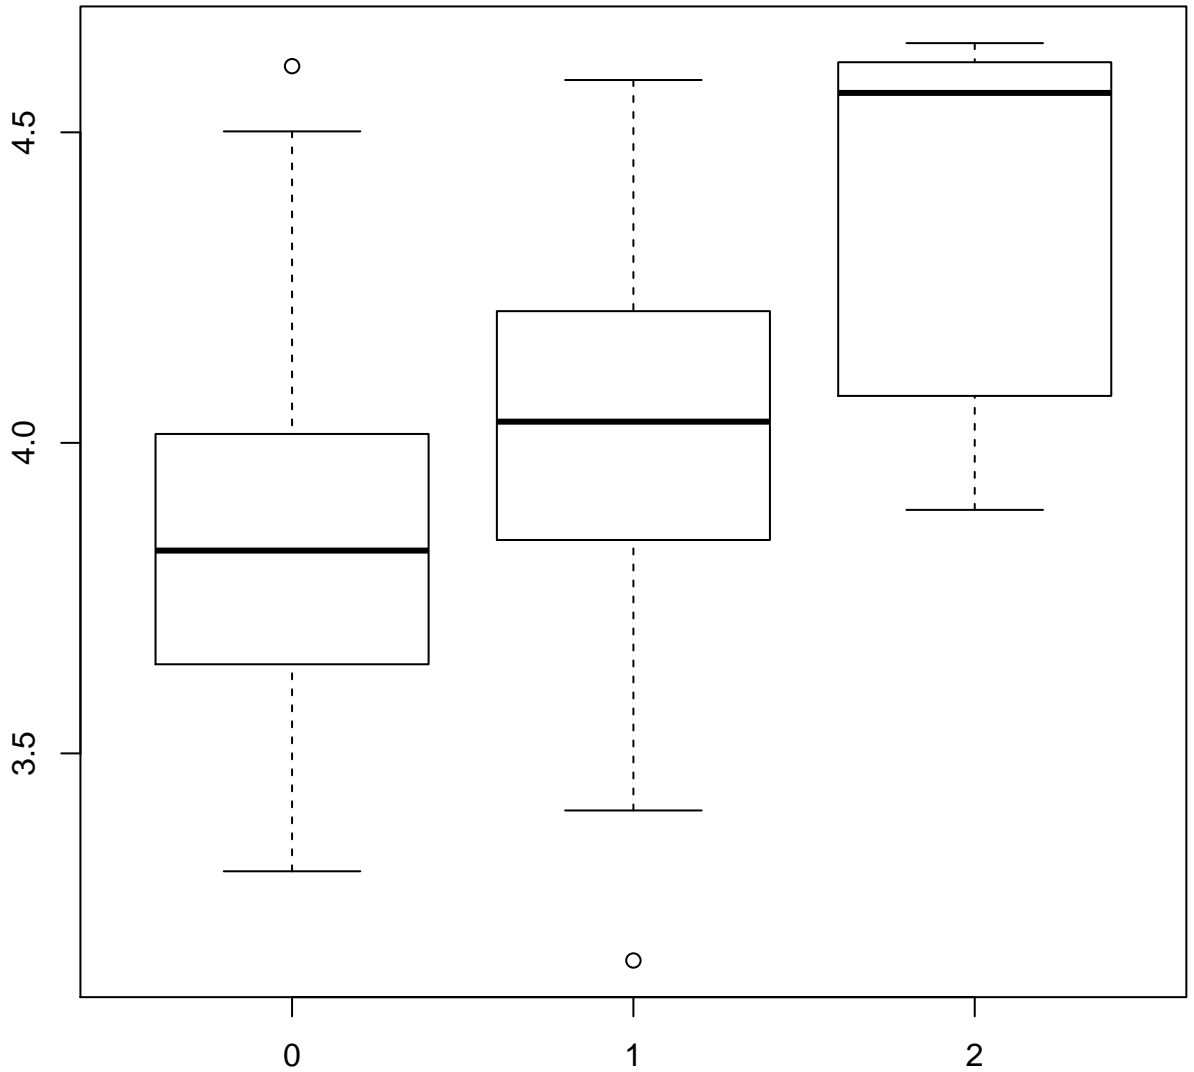

# NEFM by rs1859962 in normal

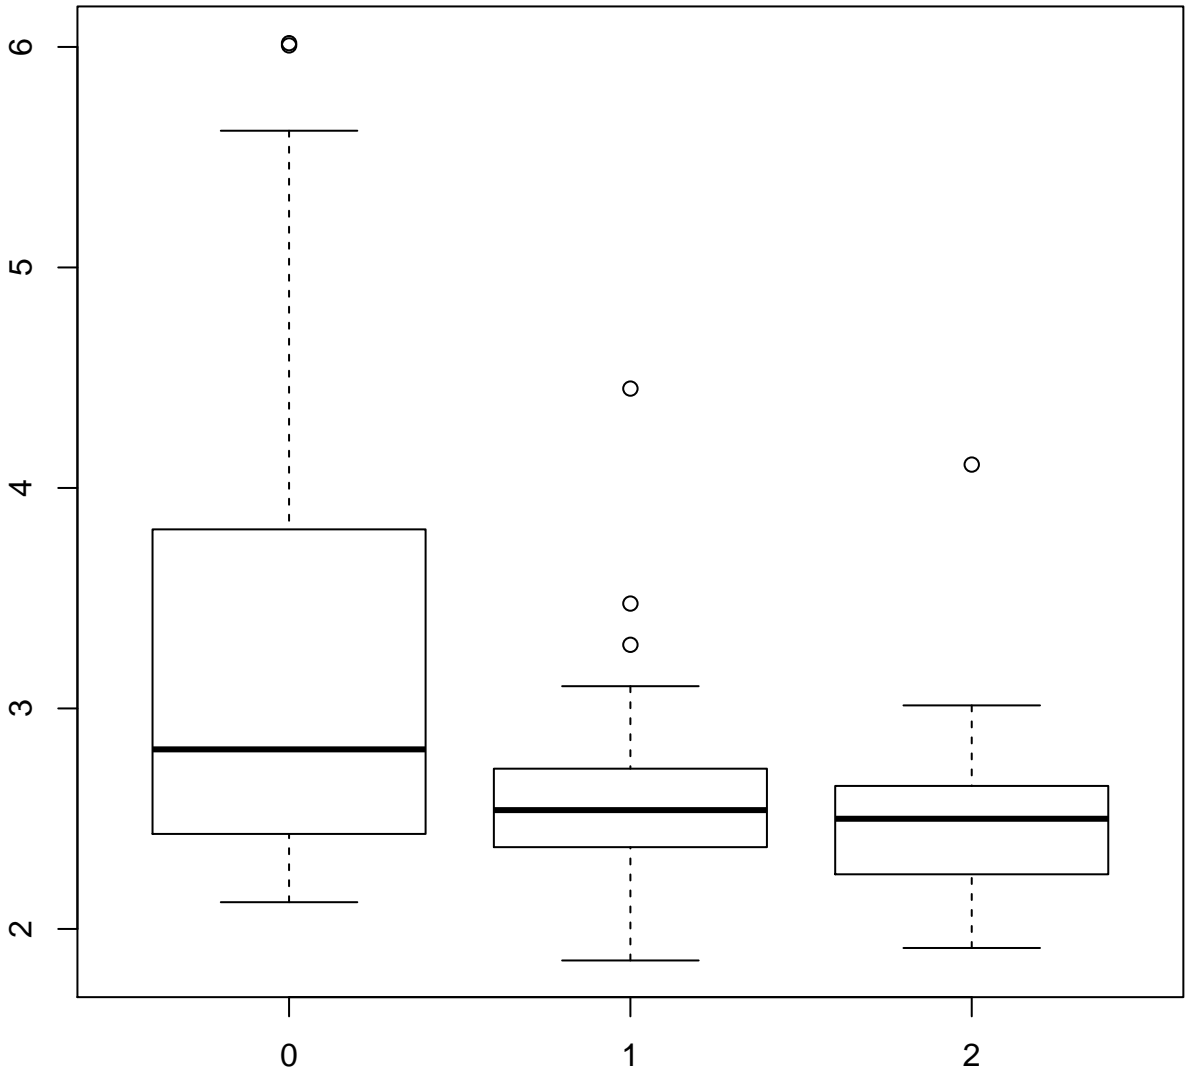

# PSCA by rs1859962 in normal

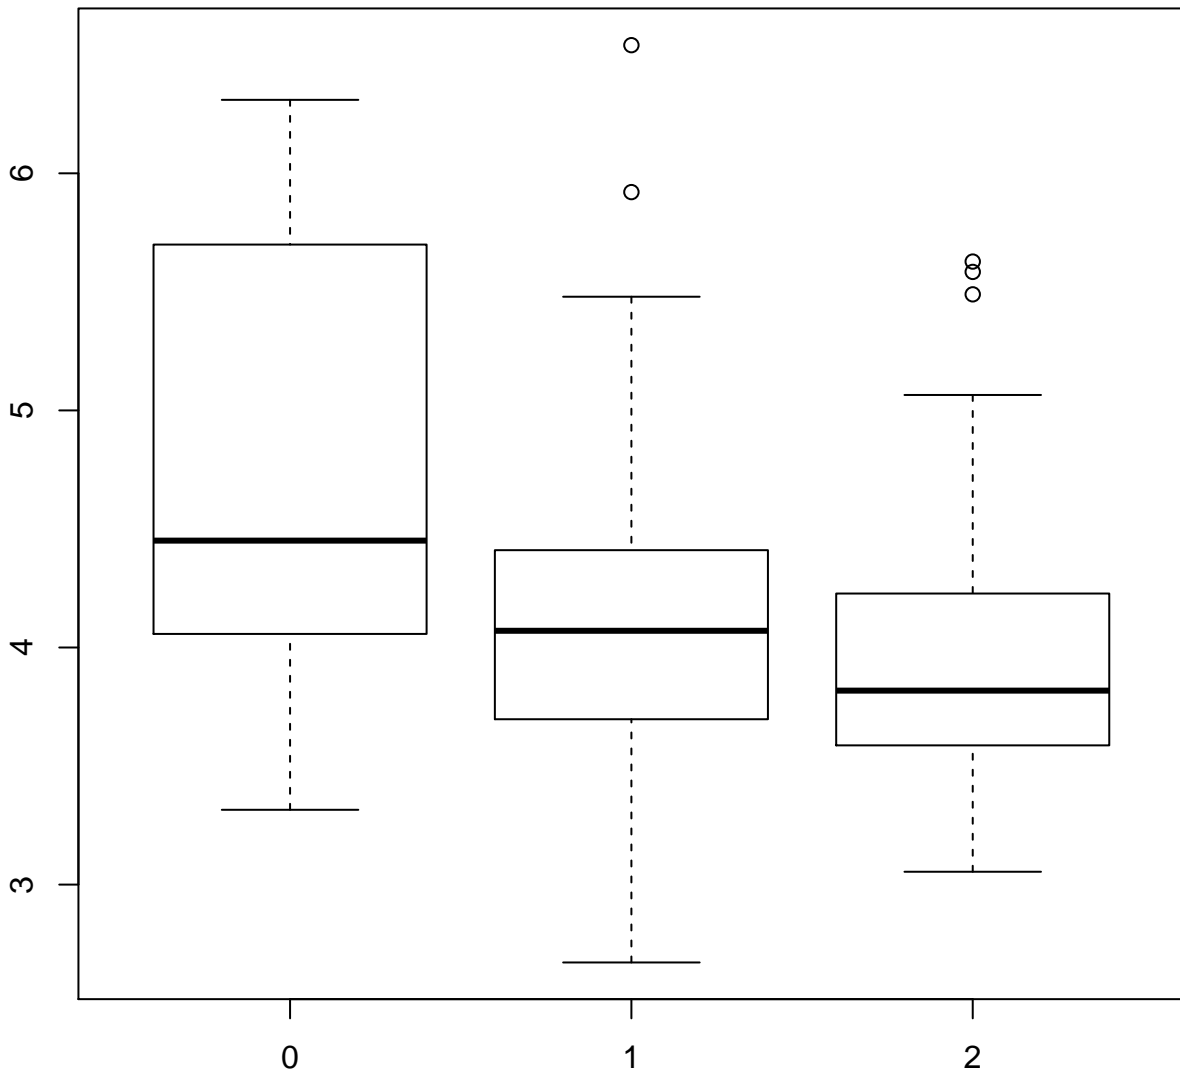

# C2orf43 by rs13385191 in normal

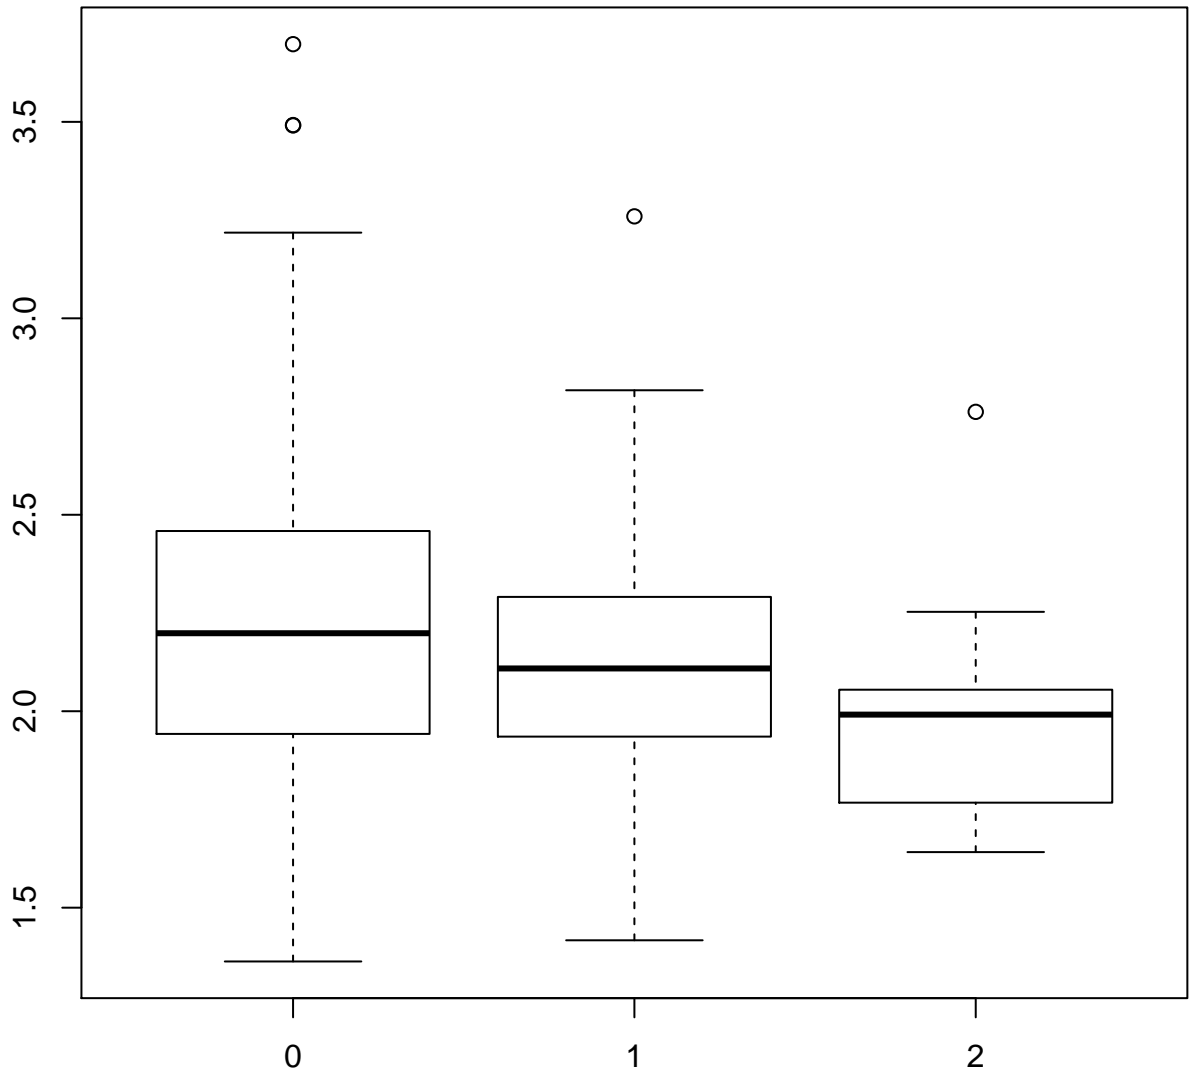

# MLPH by rs2292884 in normal

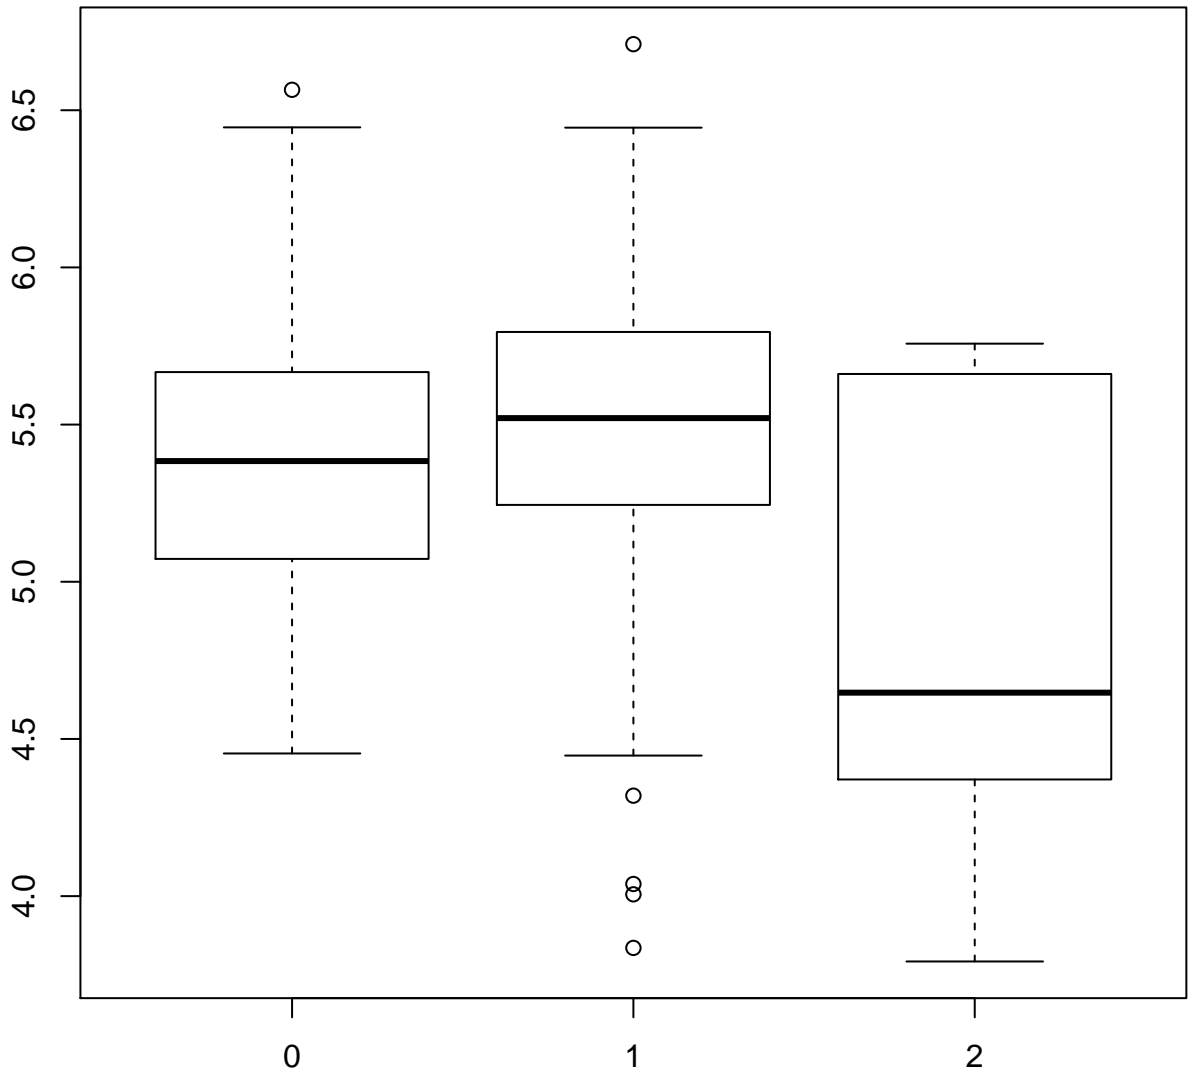

# LRRFIP1 by rs2292884 in normal

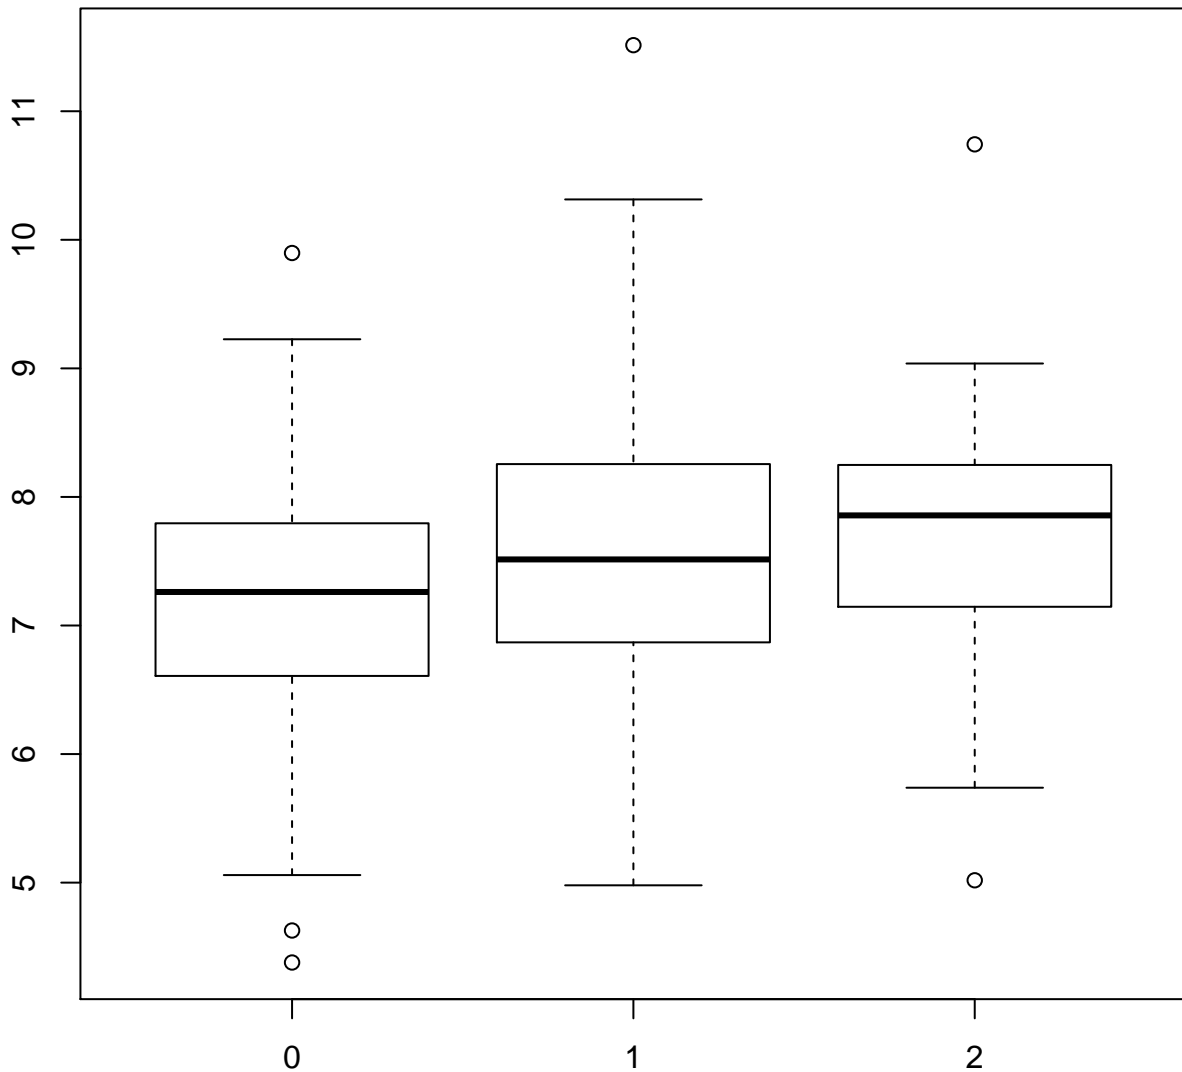

# BMPR1B by rs17021918 in normal

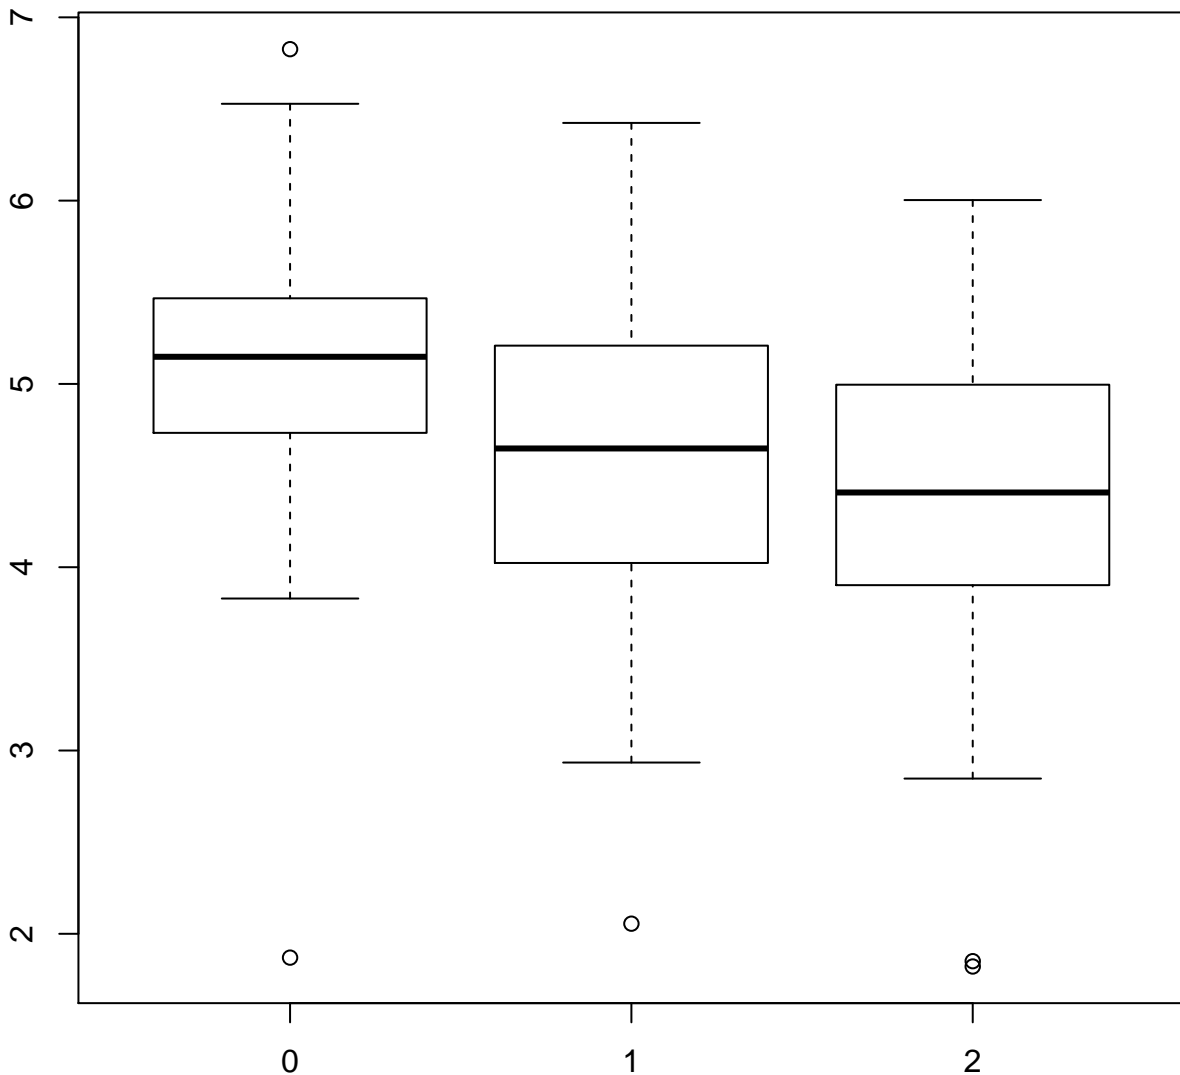



**IRX4 by rs126353946 in normal**

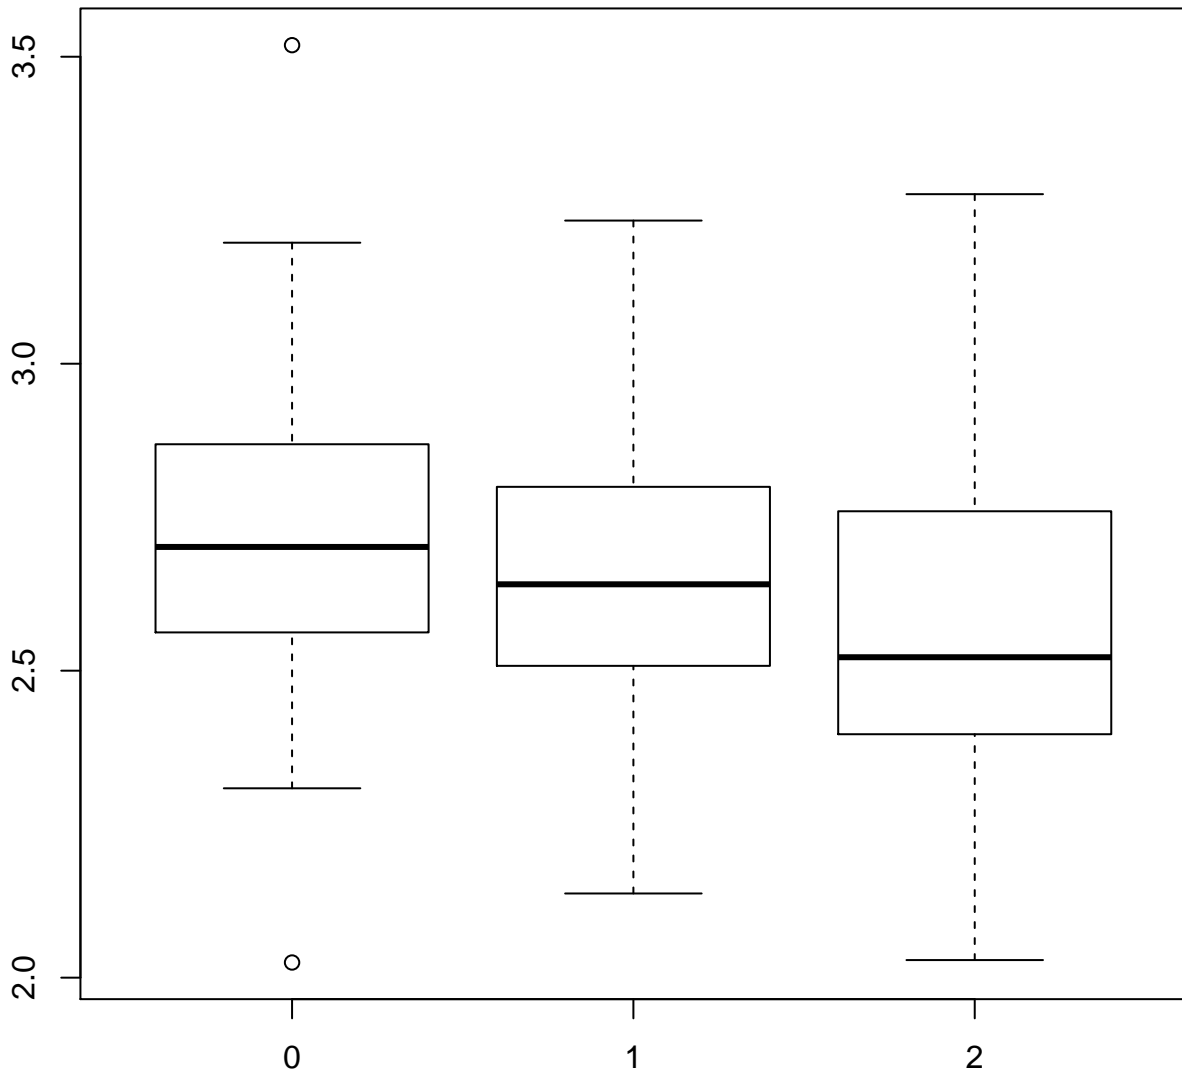

TREM2 by rs1938891 in normal

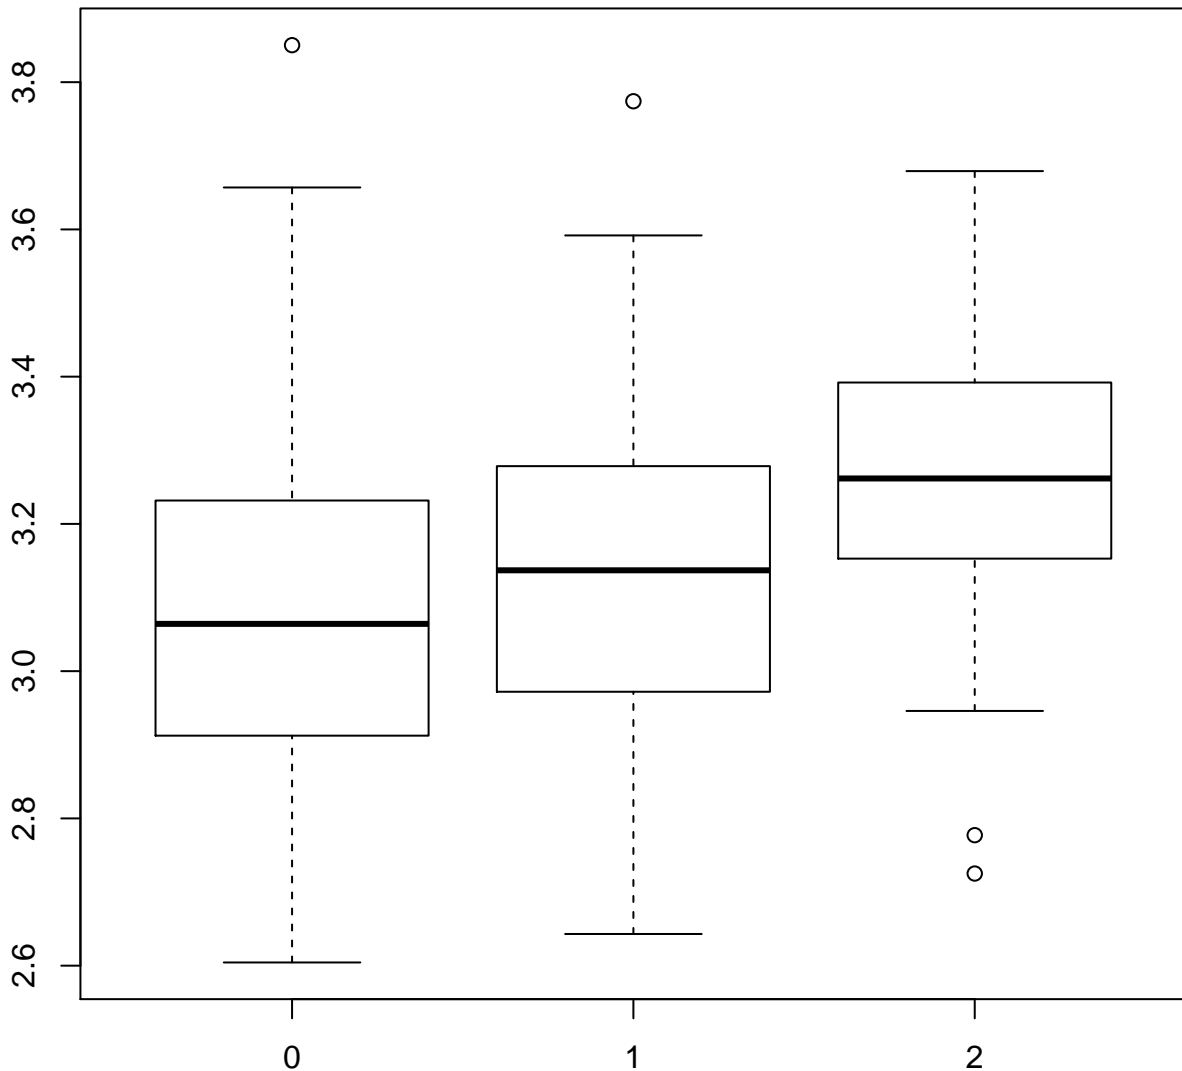

**TAX1BP1 by rs10486567 in normal**

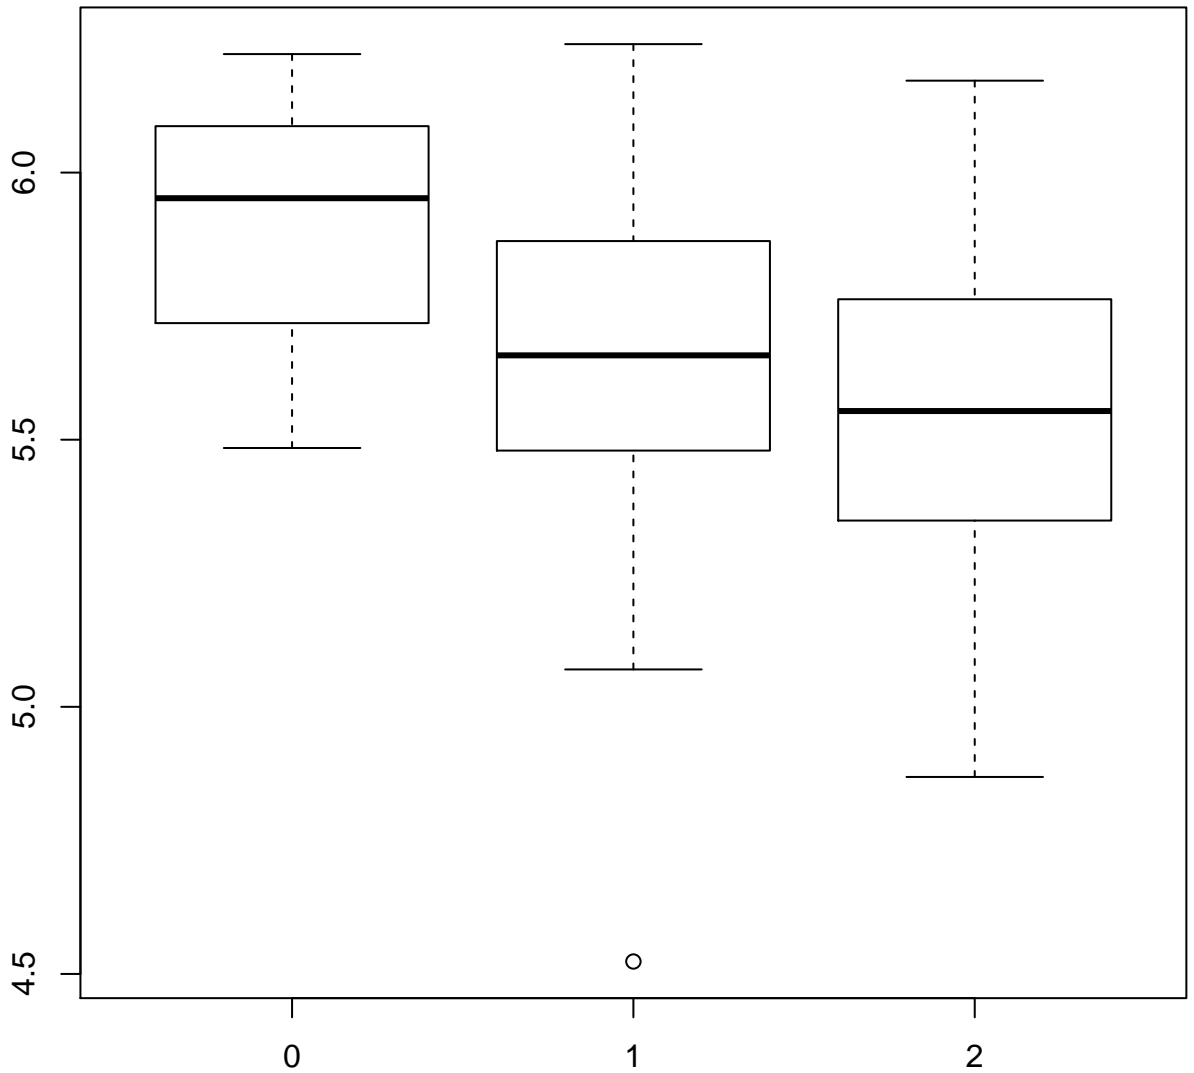

# RAB14 by rs1571801 in normal

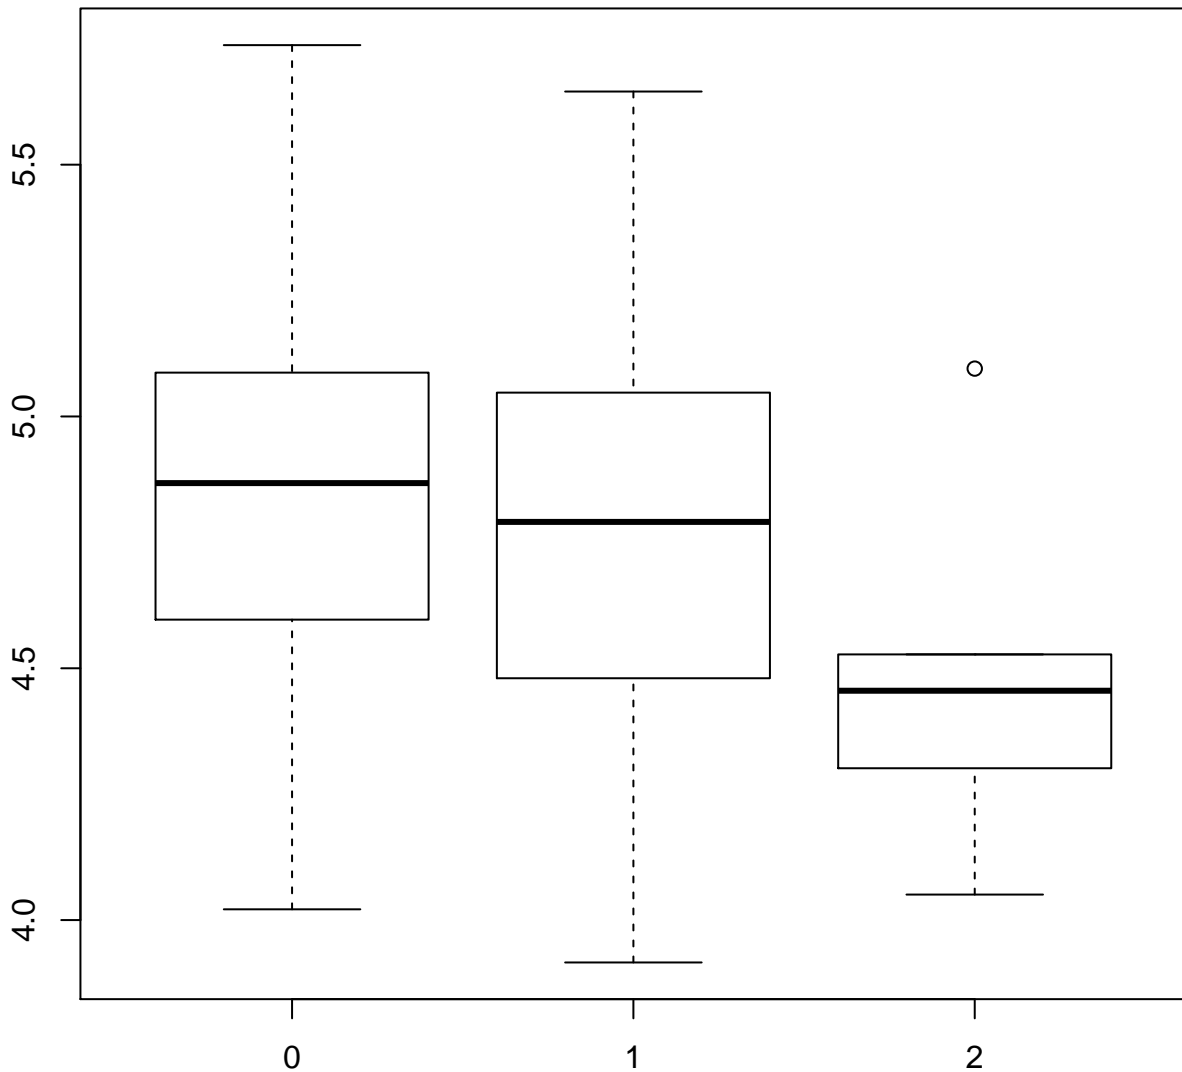

# TTL11 by rs1571801 in normal

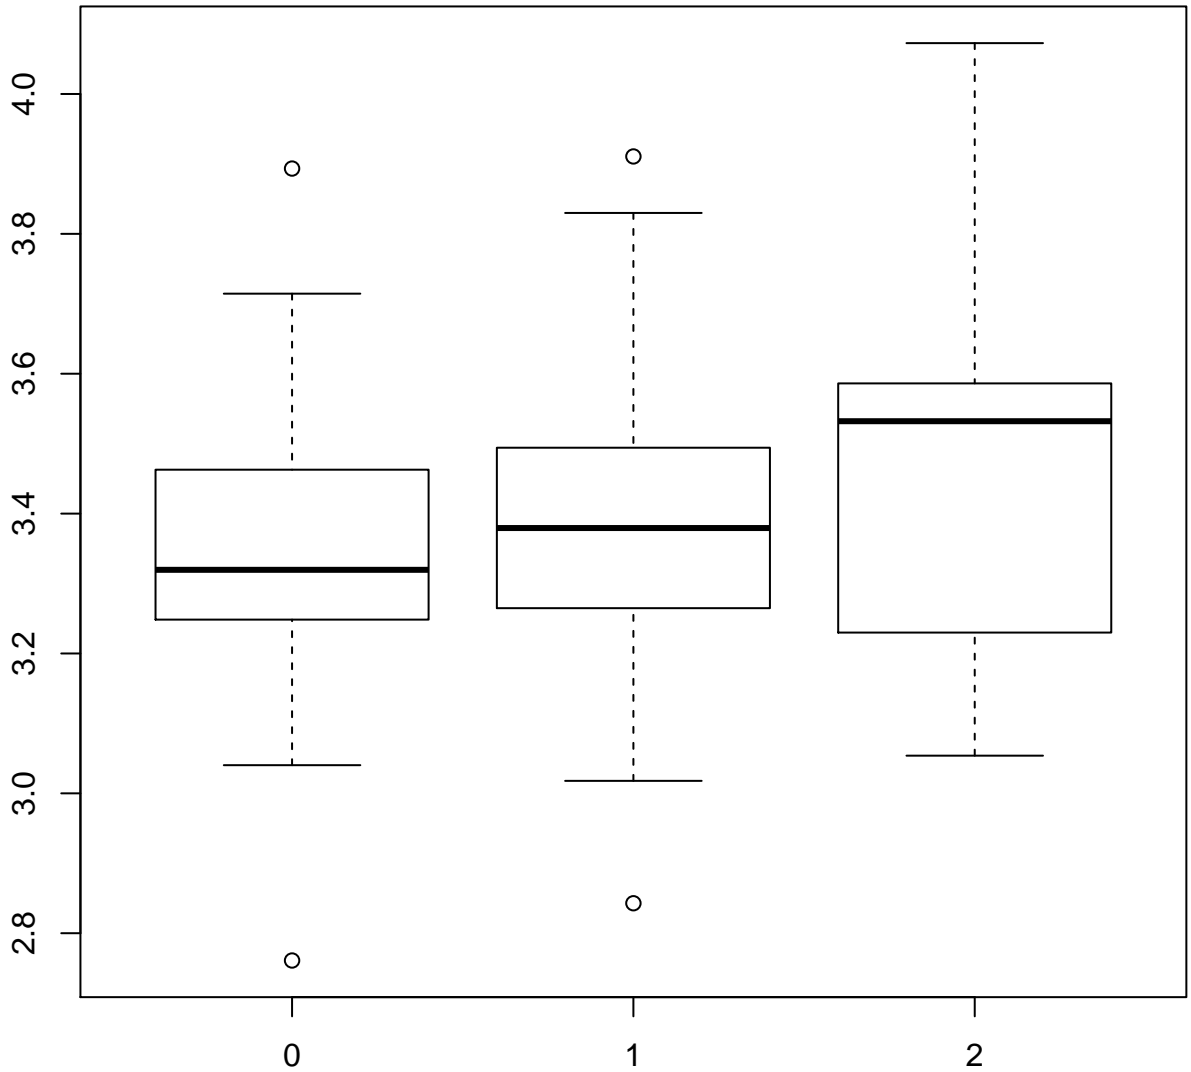

# NDUFA8 by rs1571801 in normal

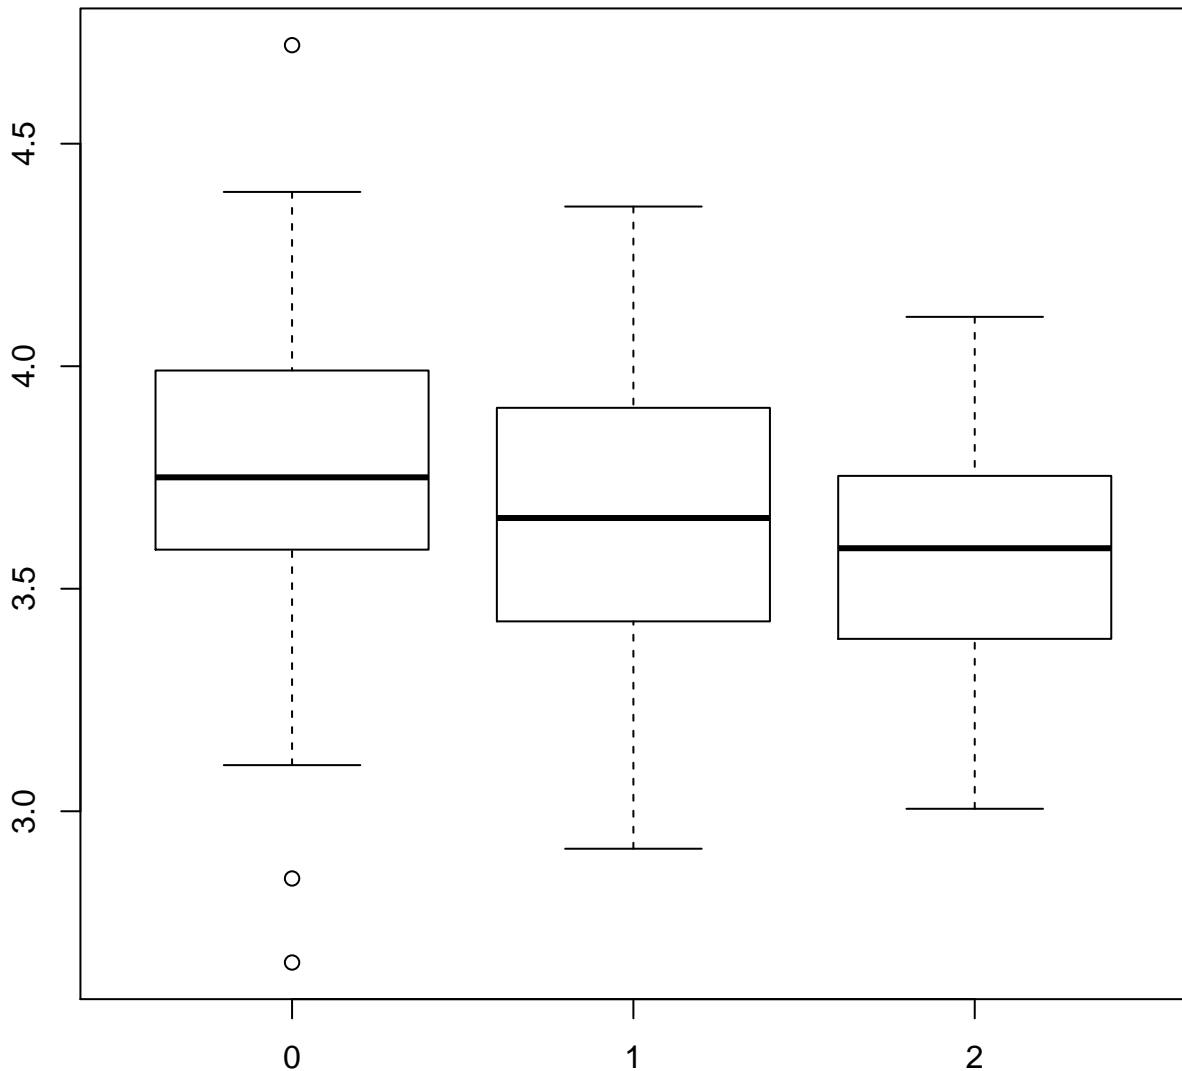

# MSMB by rs10993994 in normal

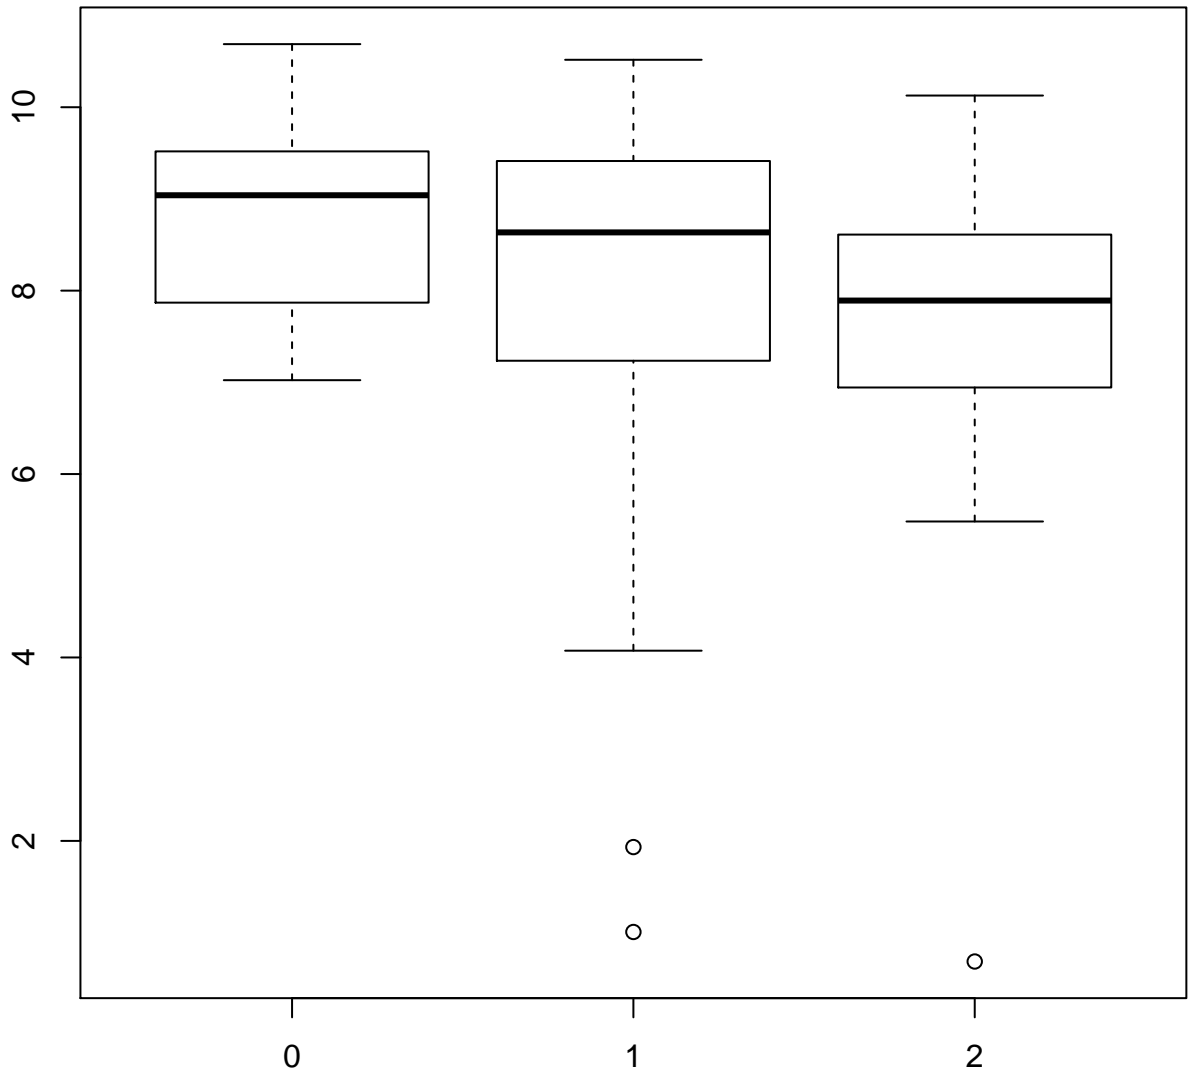

# NCOA4 by rs10993994 in normal

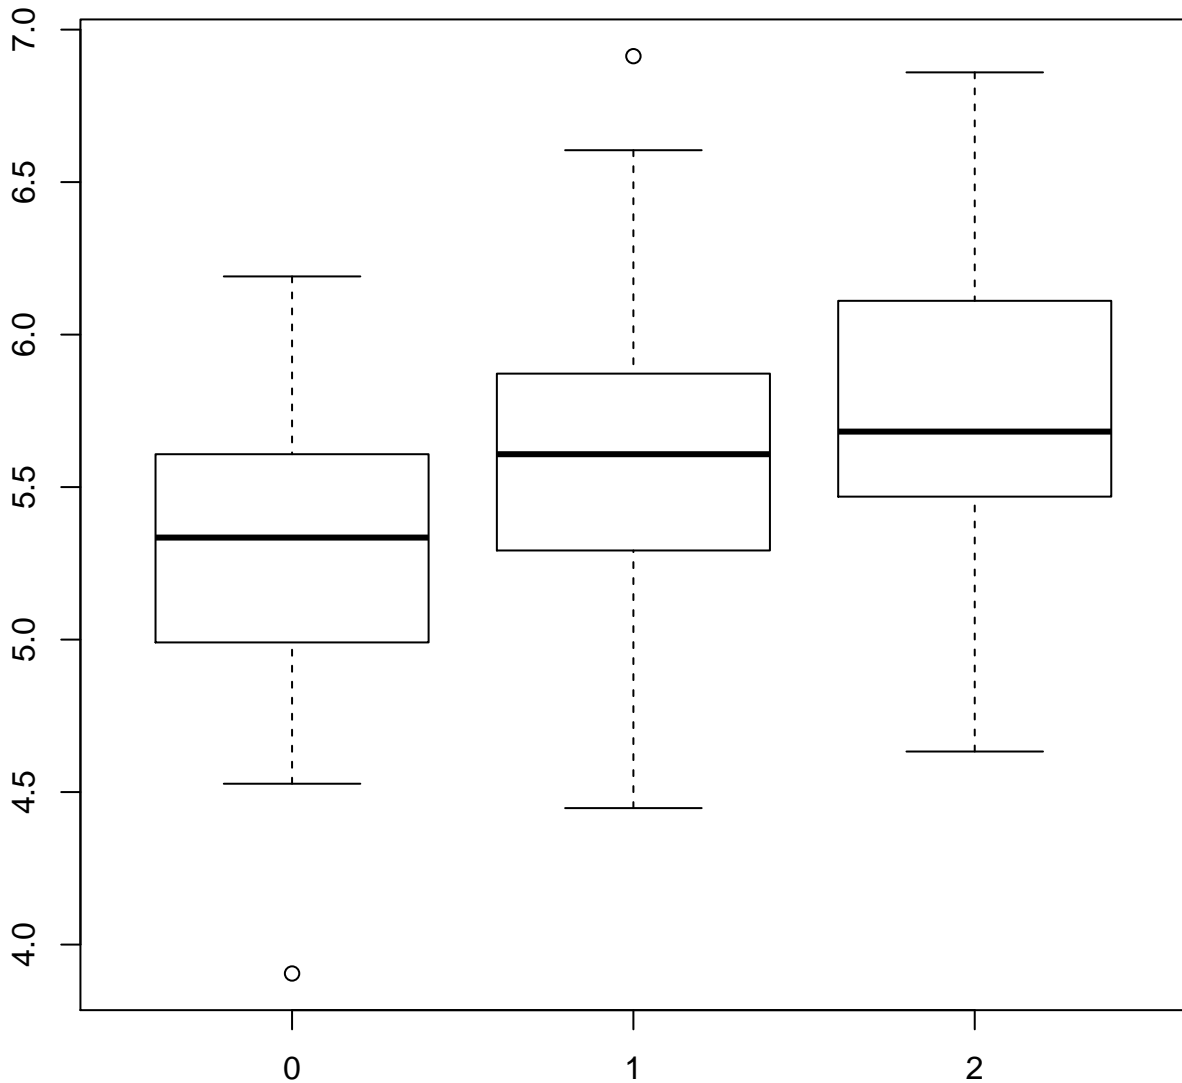



# IGHMBP2 by rs12418451 in normal

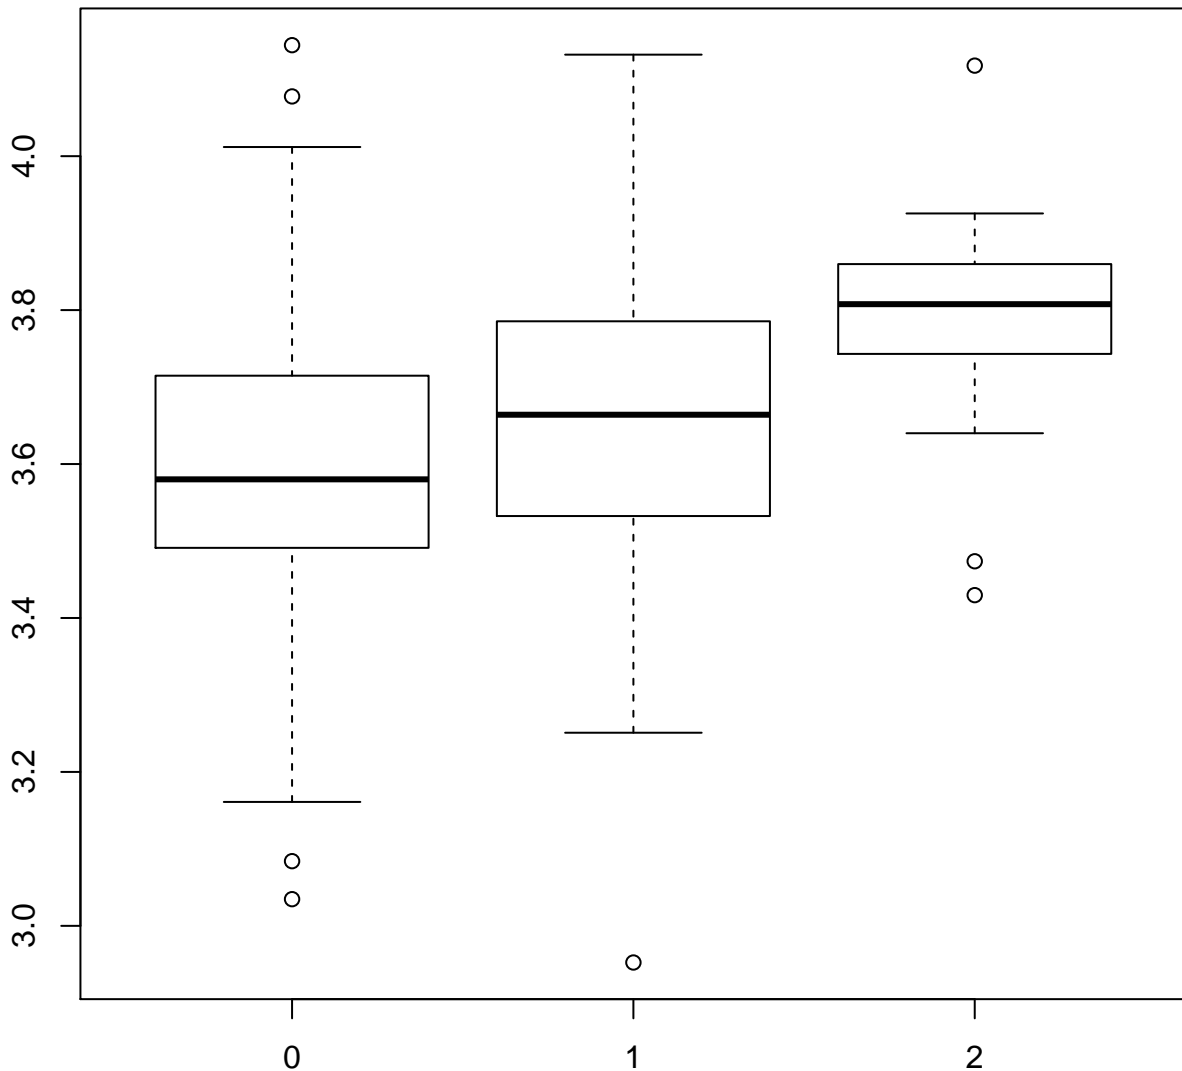

# MTL5 by rs10896449 in normal

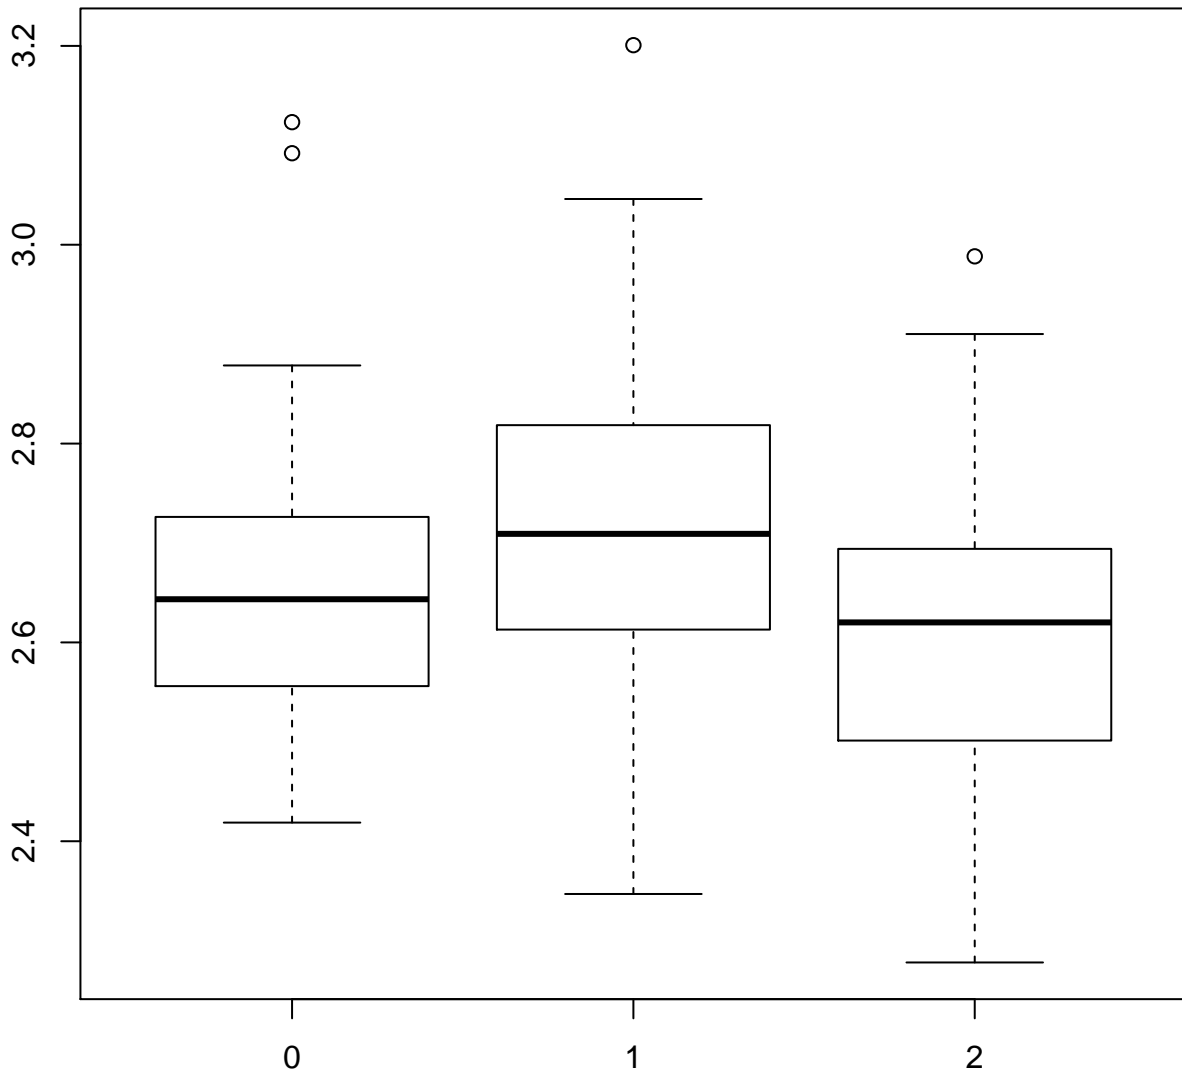

**KRT79 by rs902774 in normal**

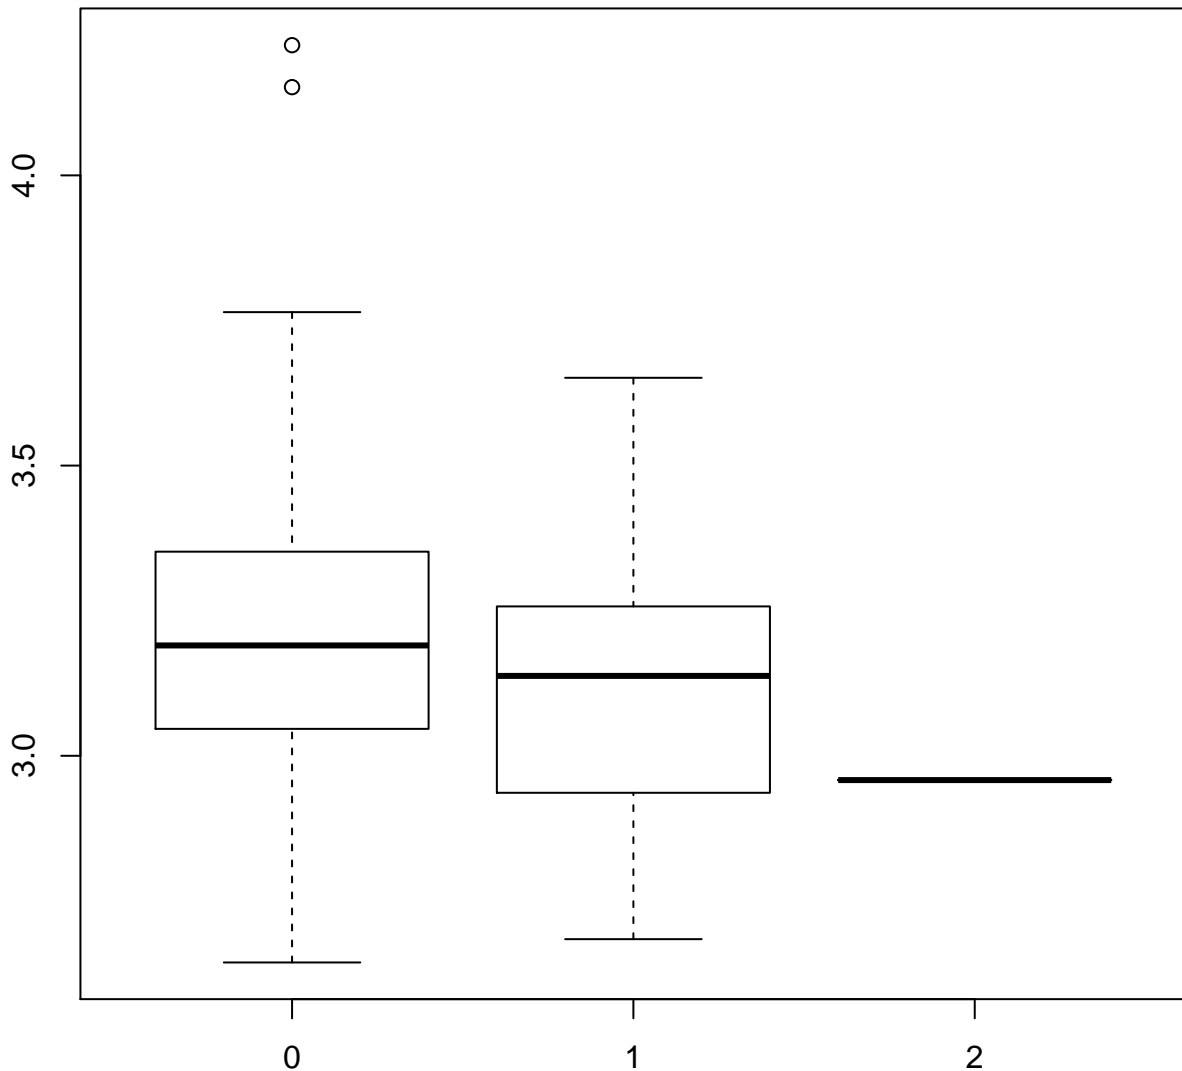

# ESPL1 by rs902774 in normal

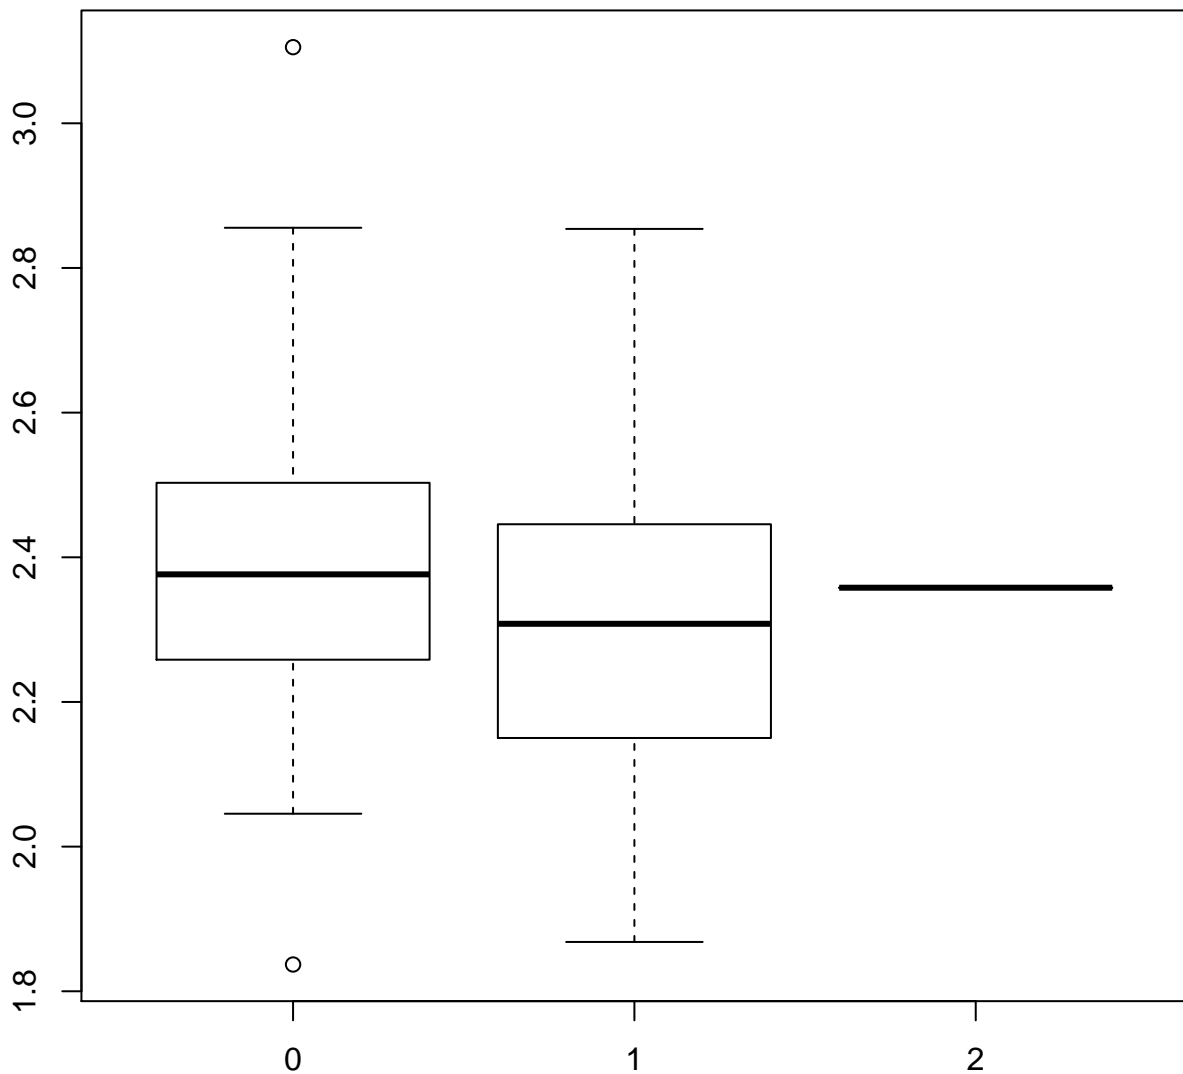

# SP7 by rs902774 in normal

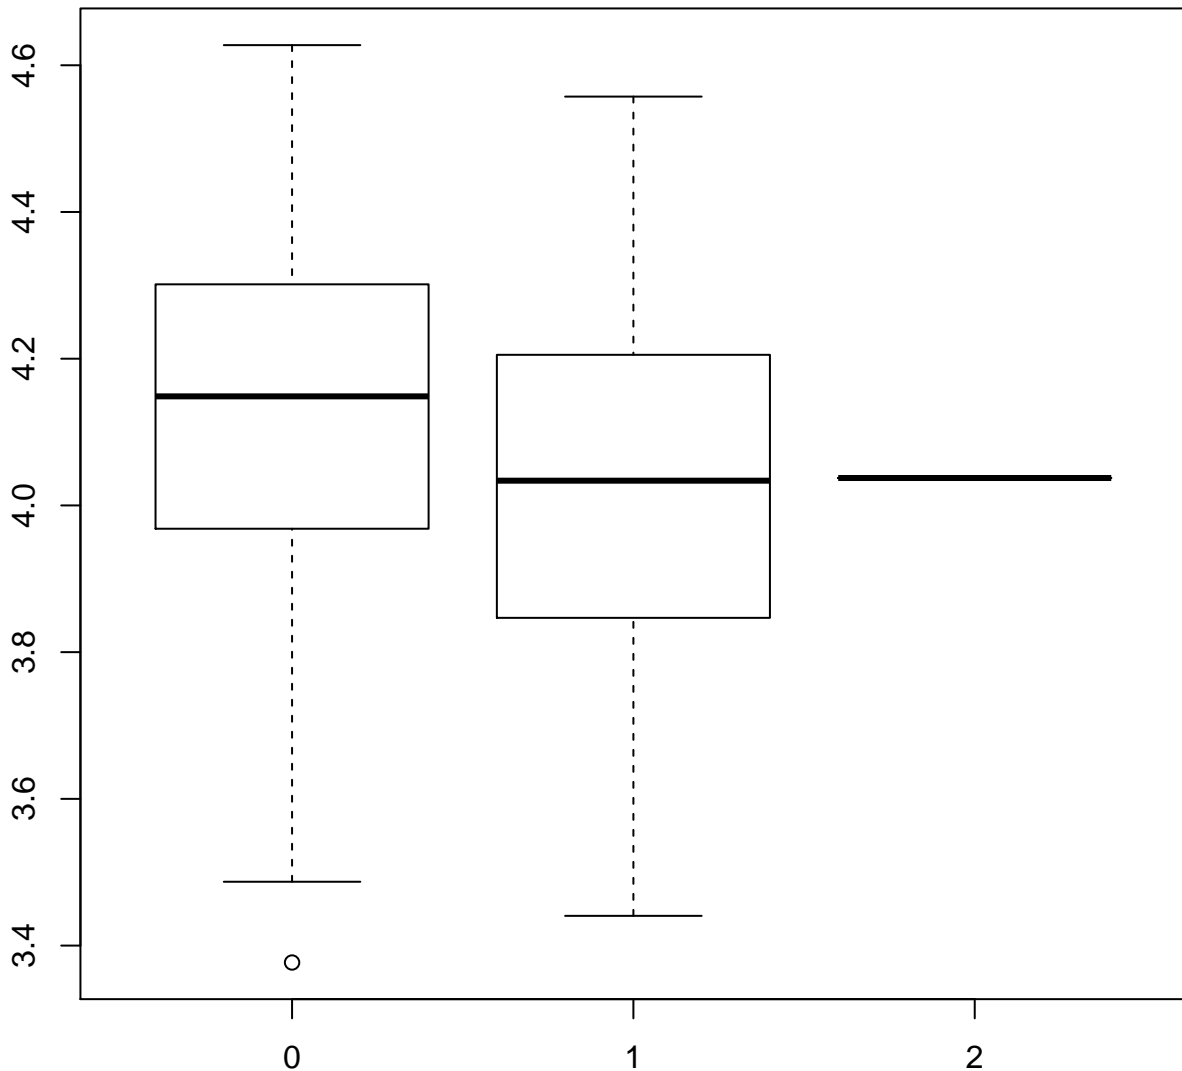

# PPP1R14A by rs8102476 in normal

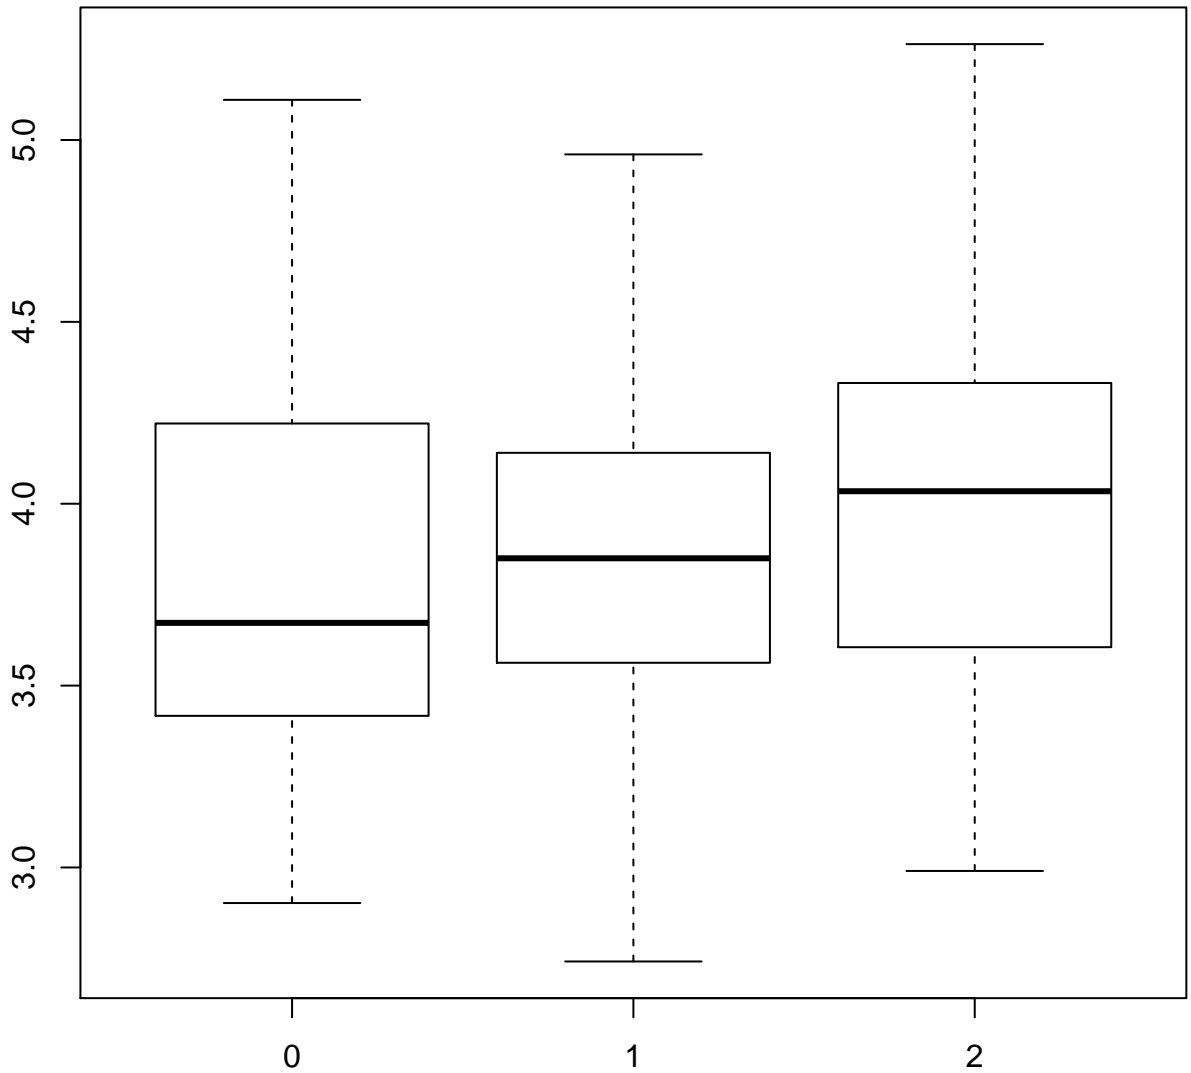

**GGN by rs8102476 in normal**

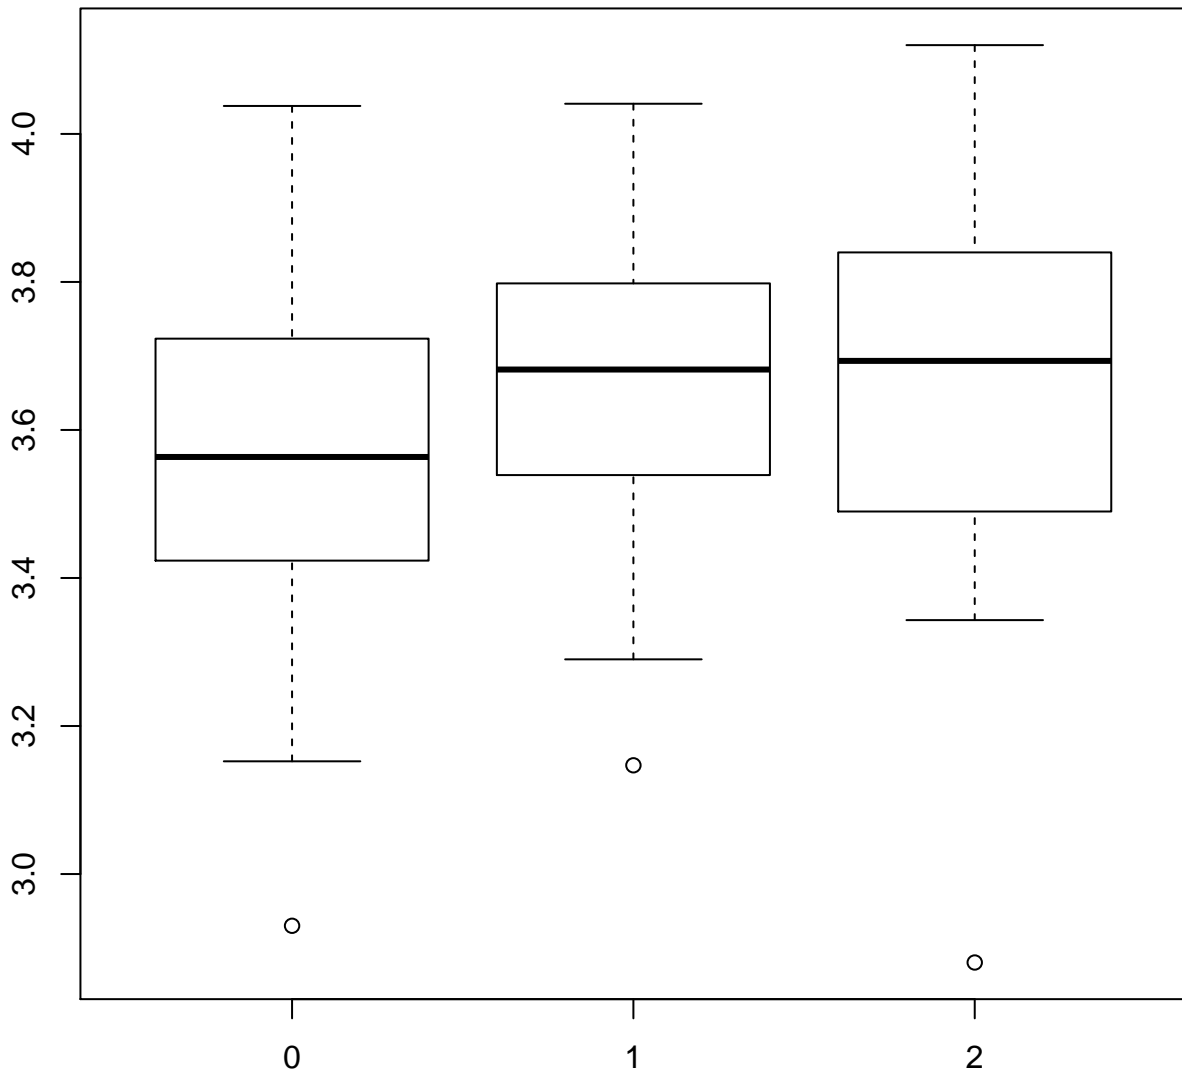

# CYP2F1 by rs11672691 in normal

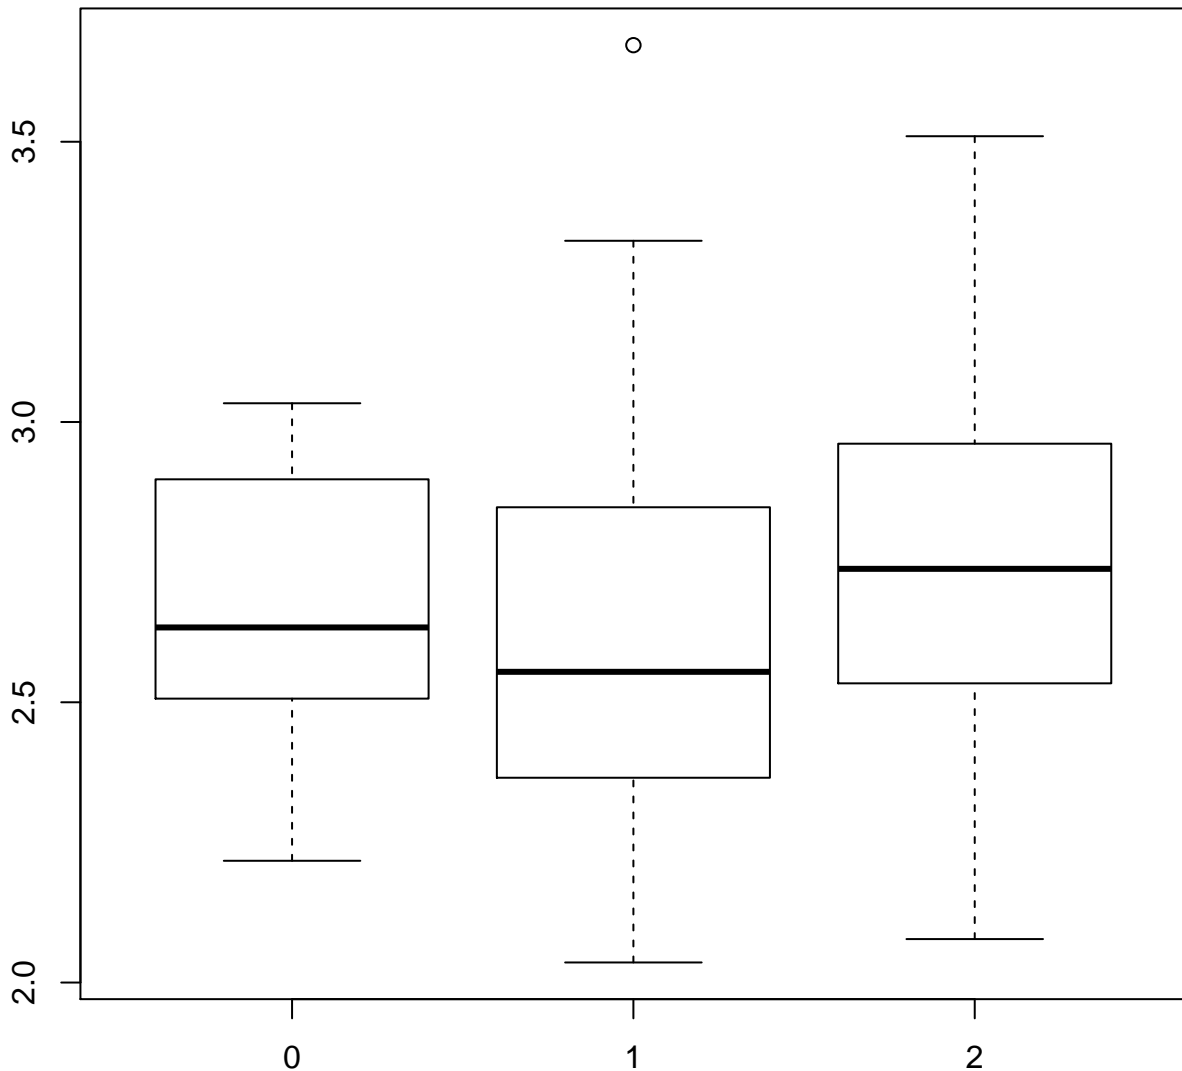



# NUDT11 by rs5945619 in normal

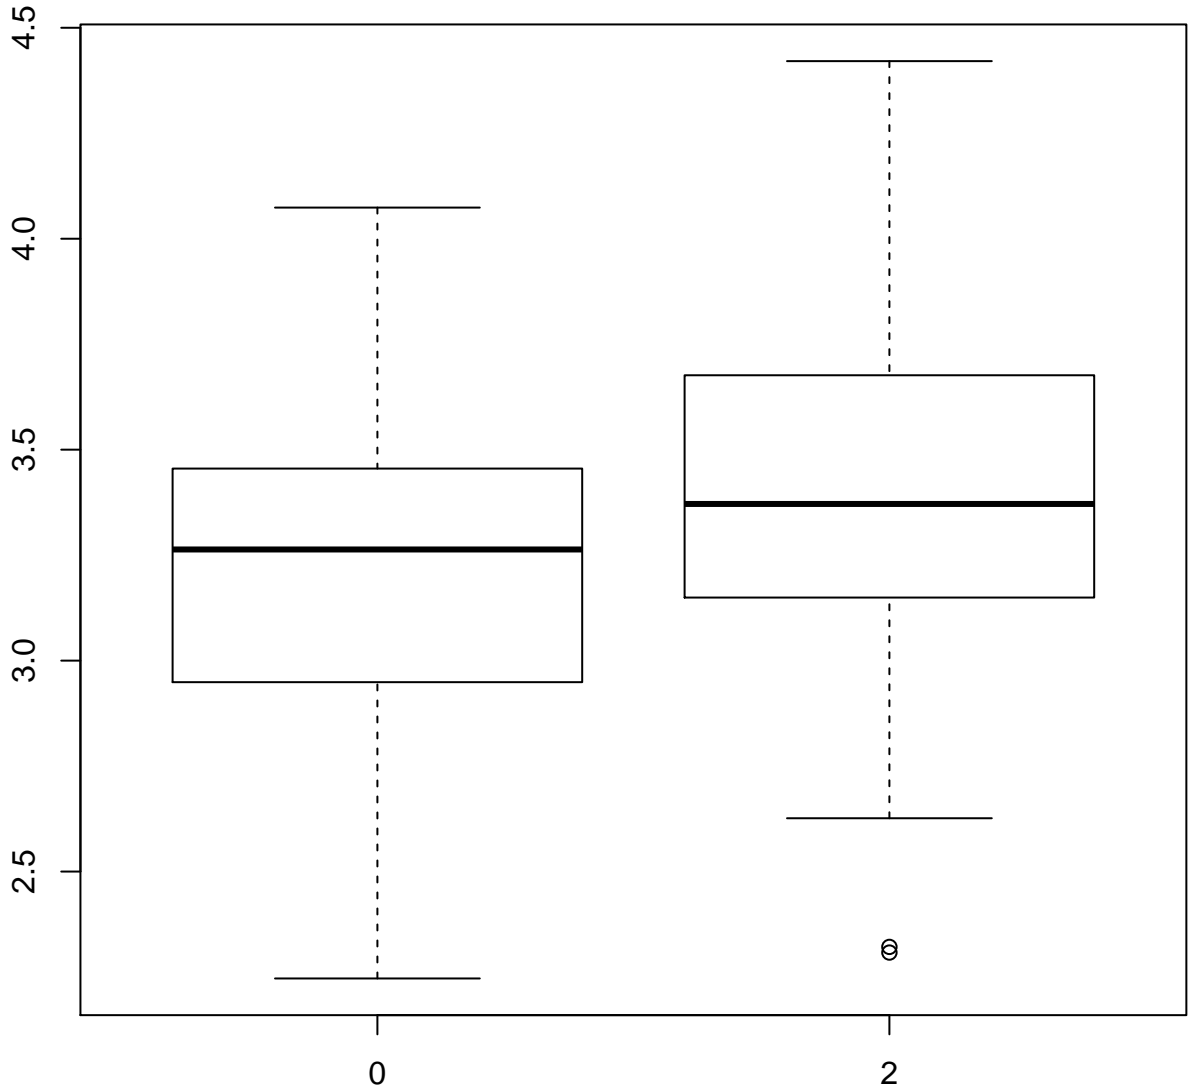

# C2orf43 by rs13385191 in tumor

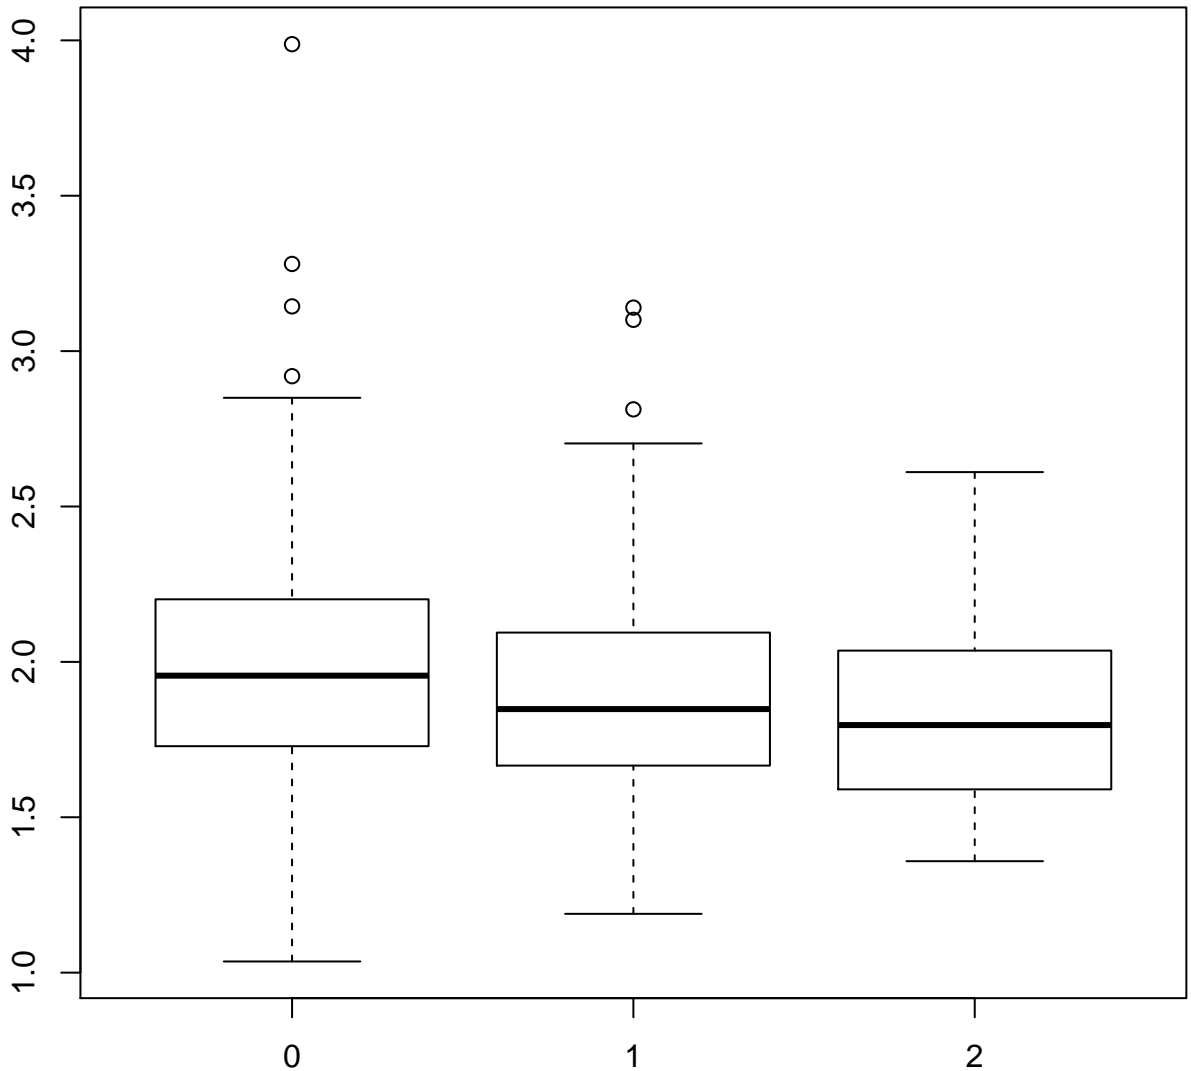

# ITGA6 by rs12621278 in tumor

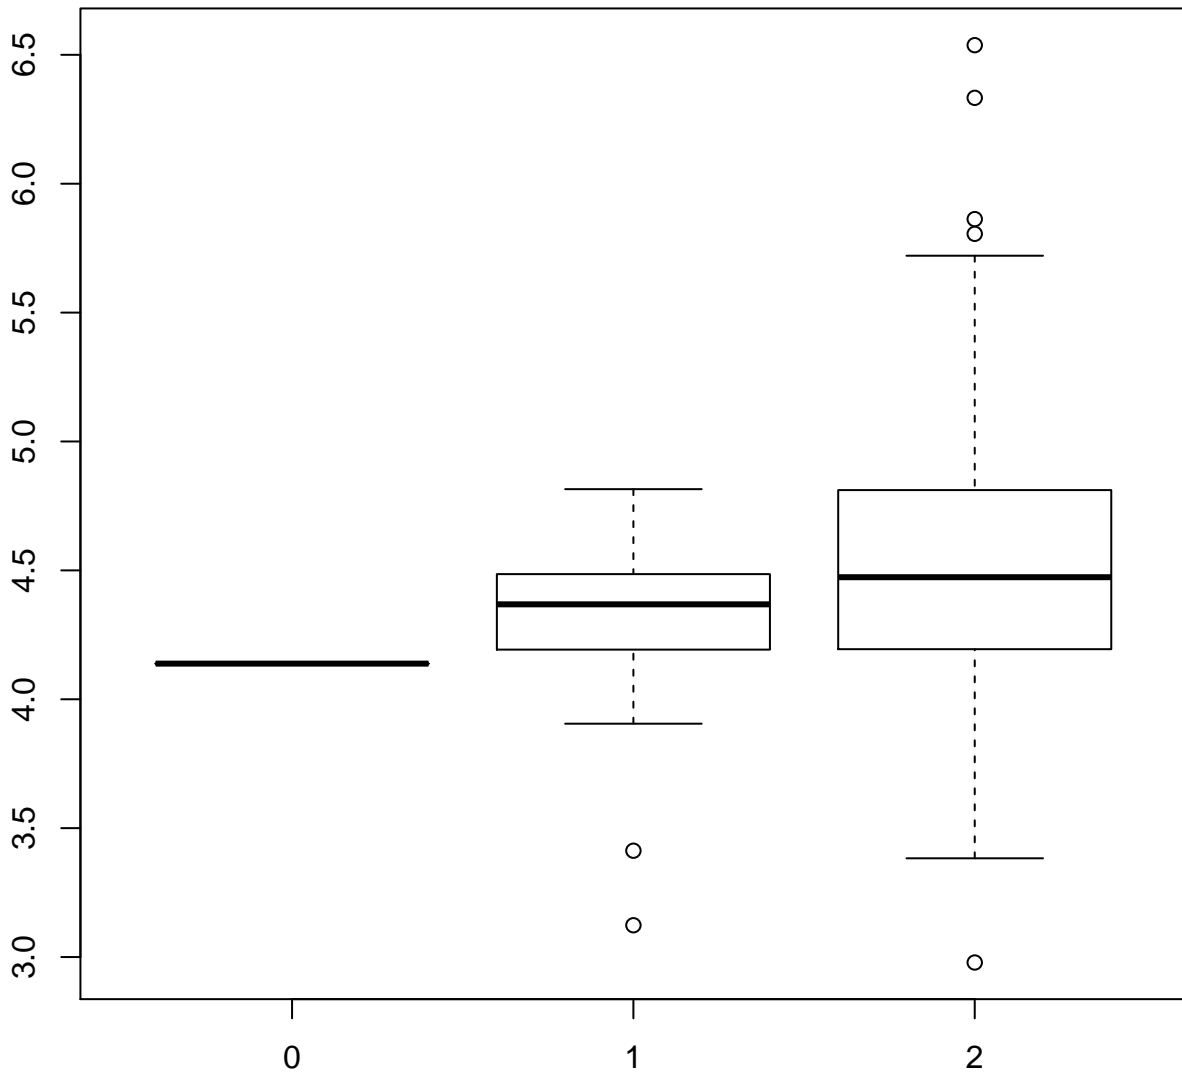

# DLX2 by rs12621278 in tumor

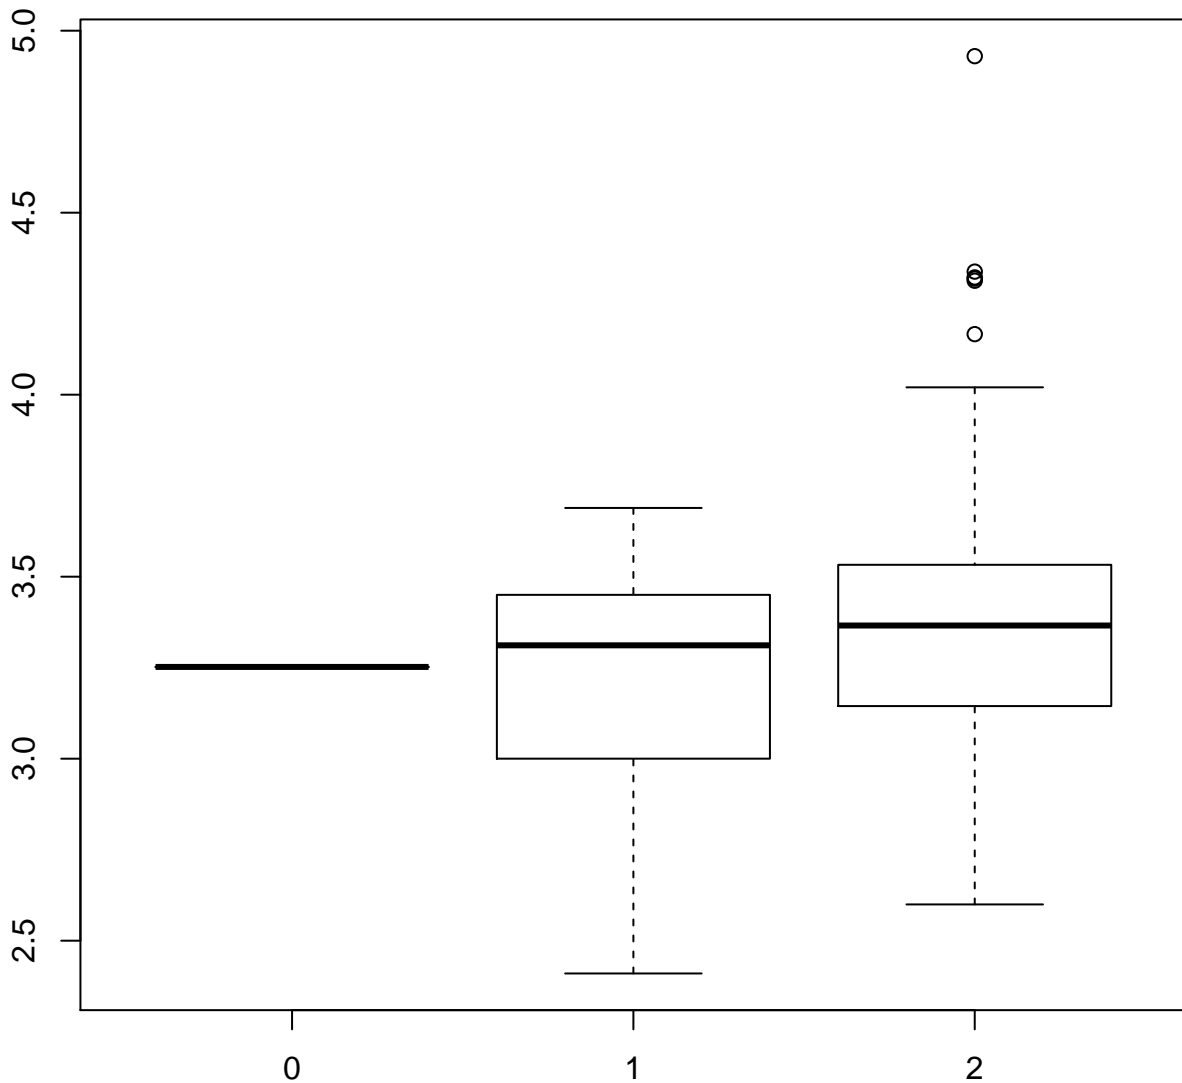

# MLPH by rs2292884 in tumor

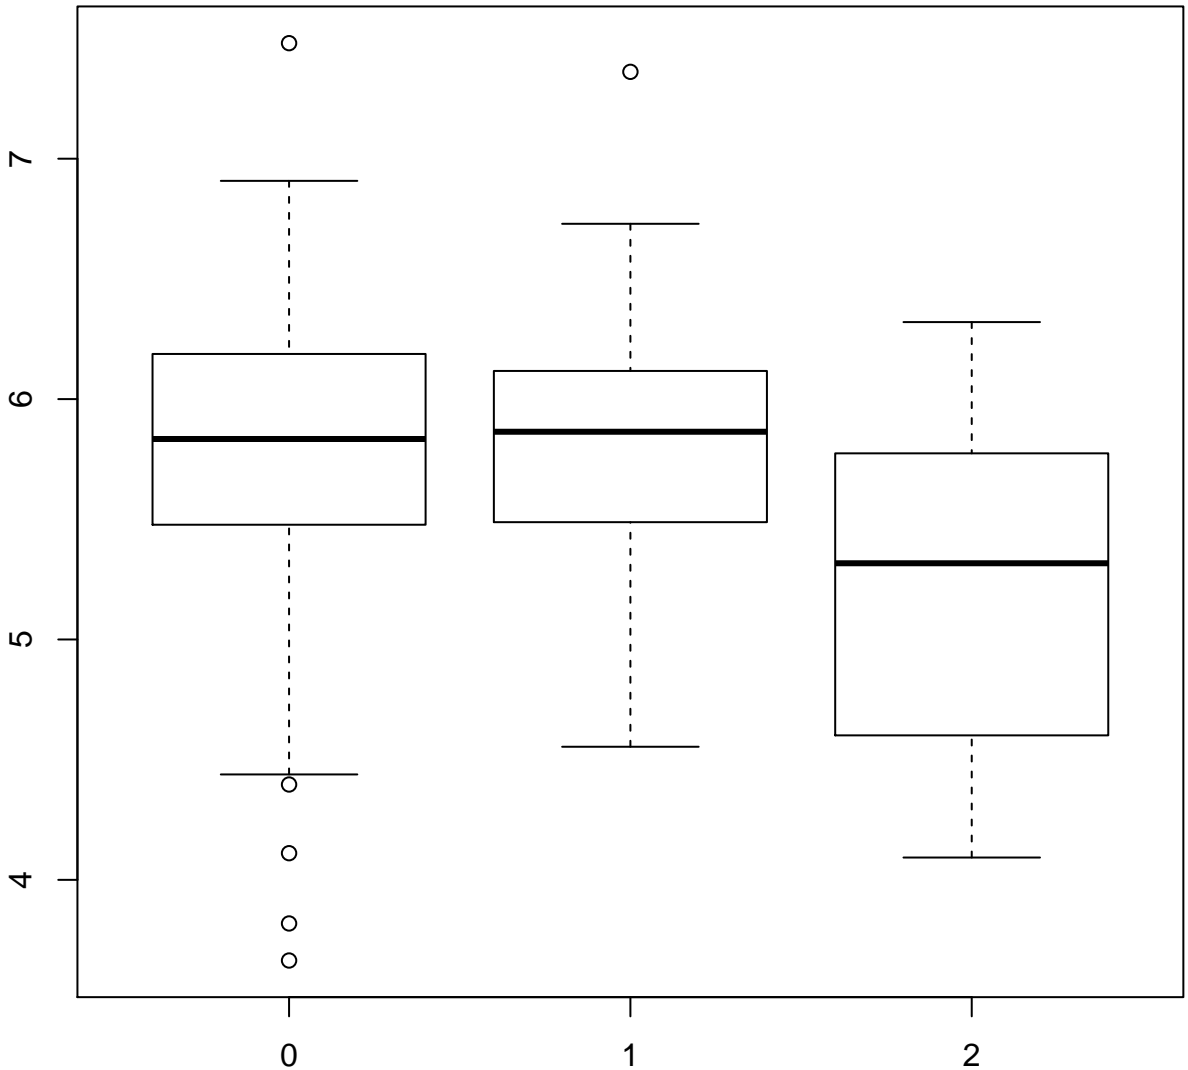

# CHMP2B by rs7629490 in tumor

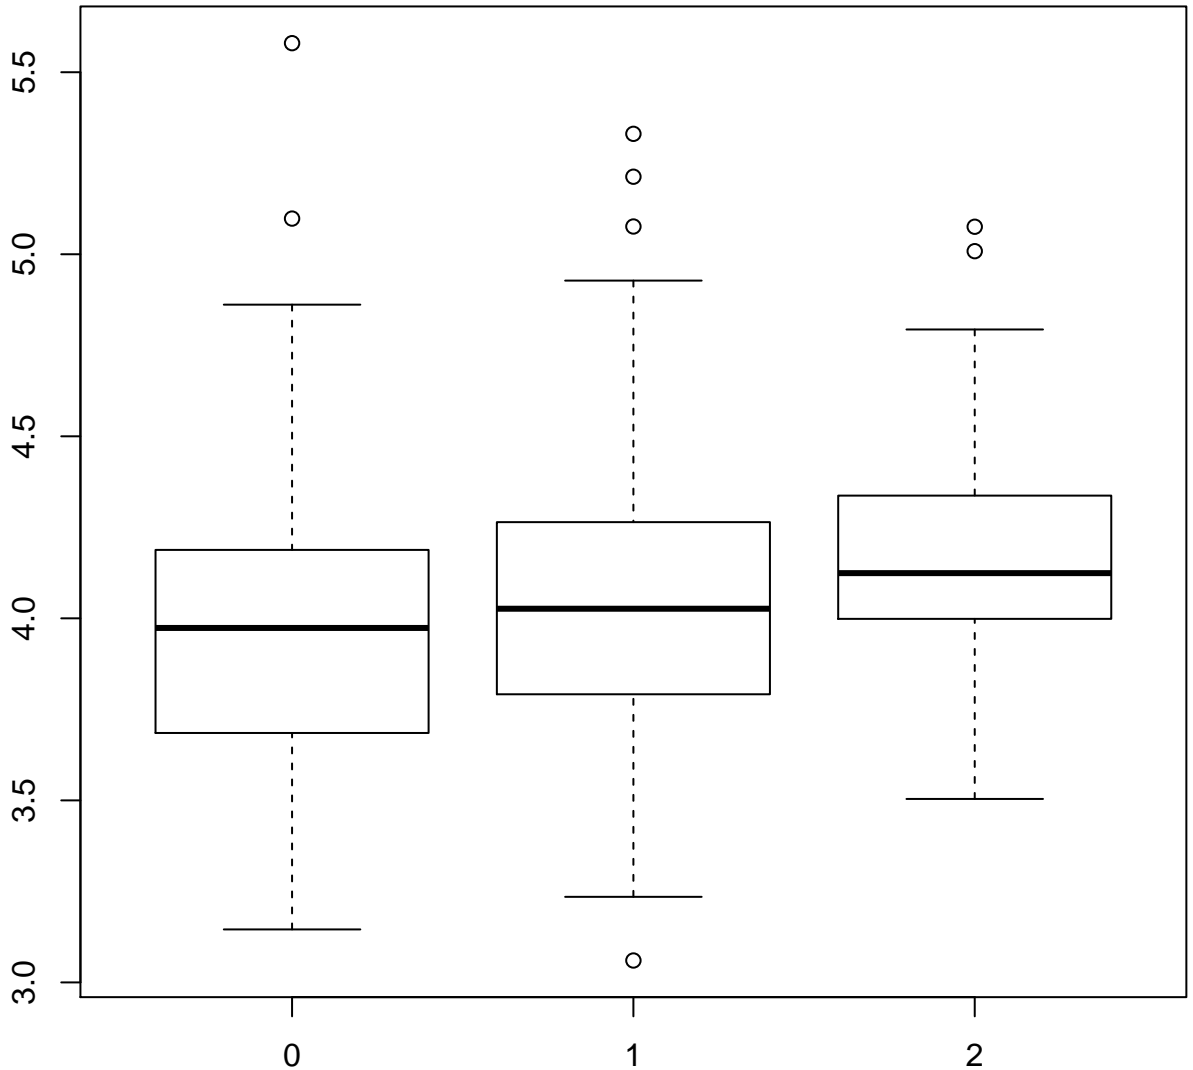

# BMPR1B by rs17021918 in tumor

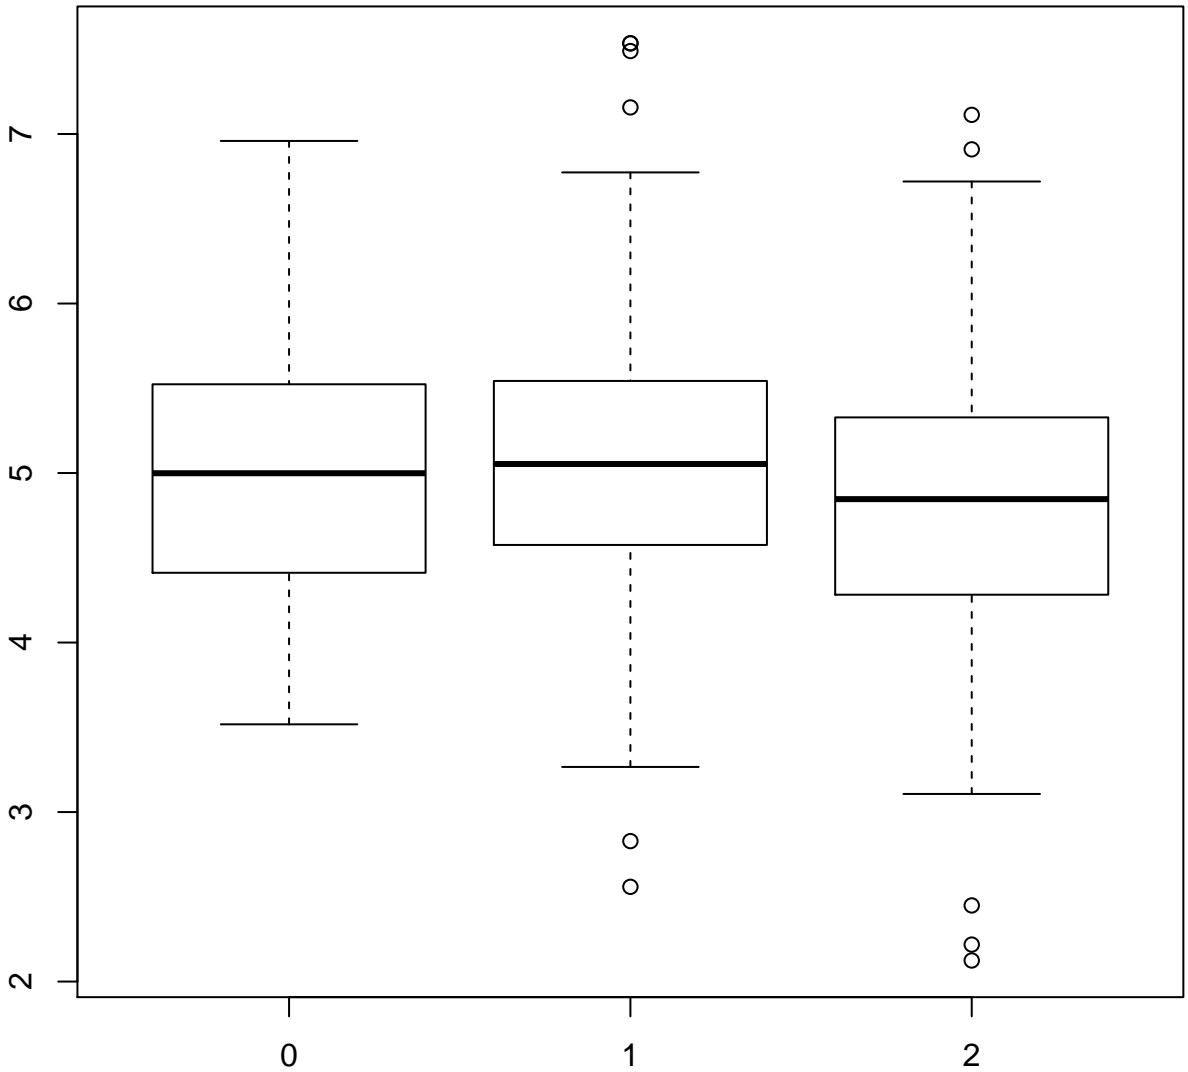

# IRX4 by rs126353946 in tumor

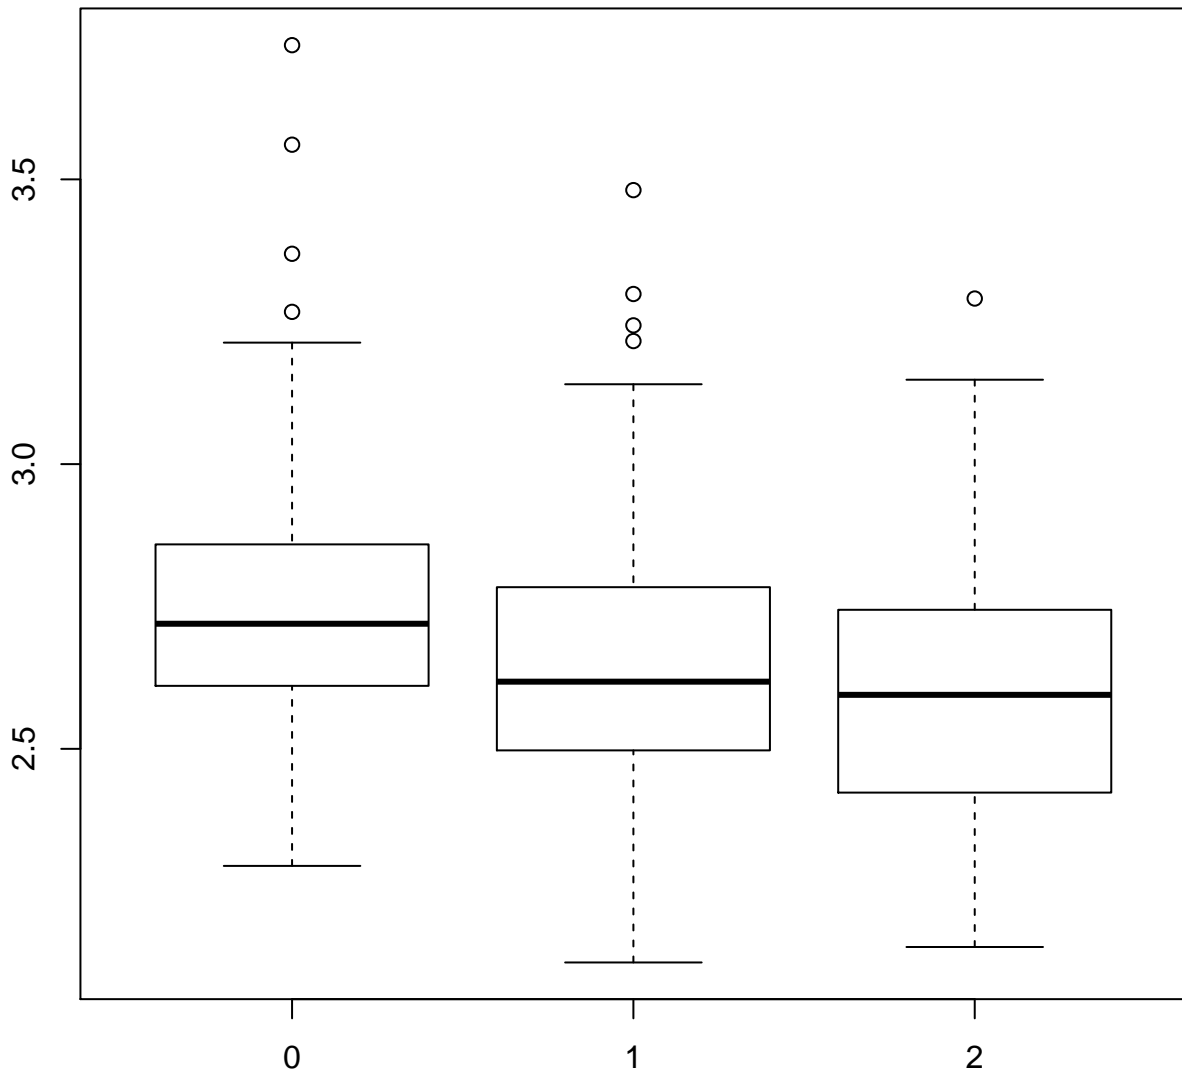



# MED20 by rs1938891 in tumor

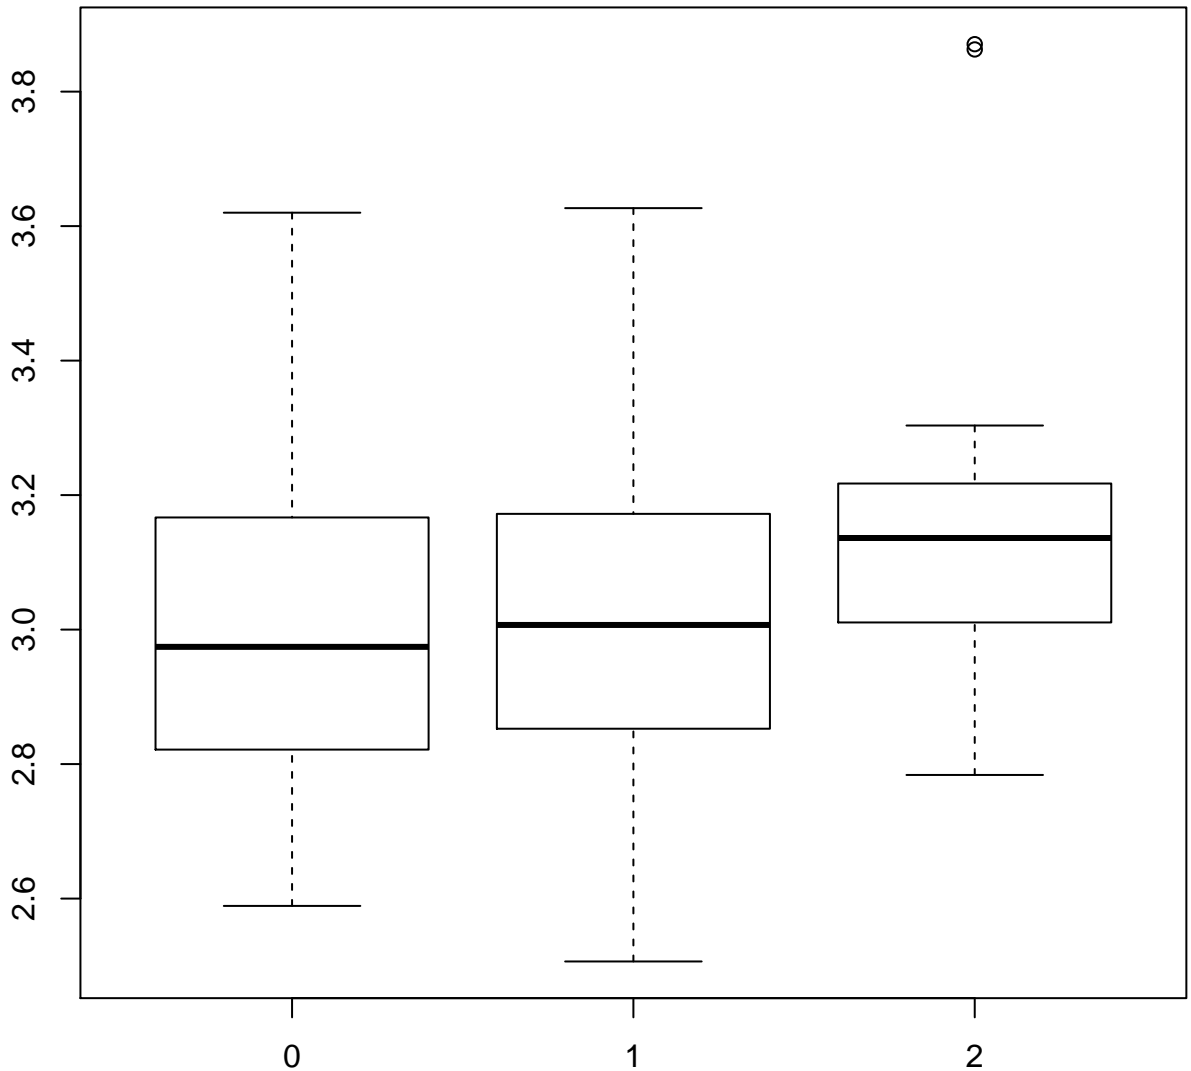

# RSPH4A by rs339331 in tumor

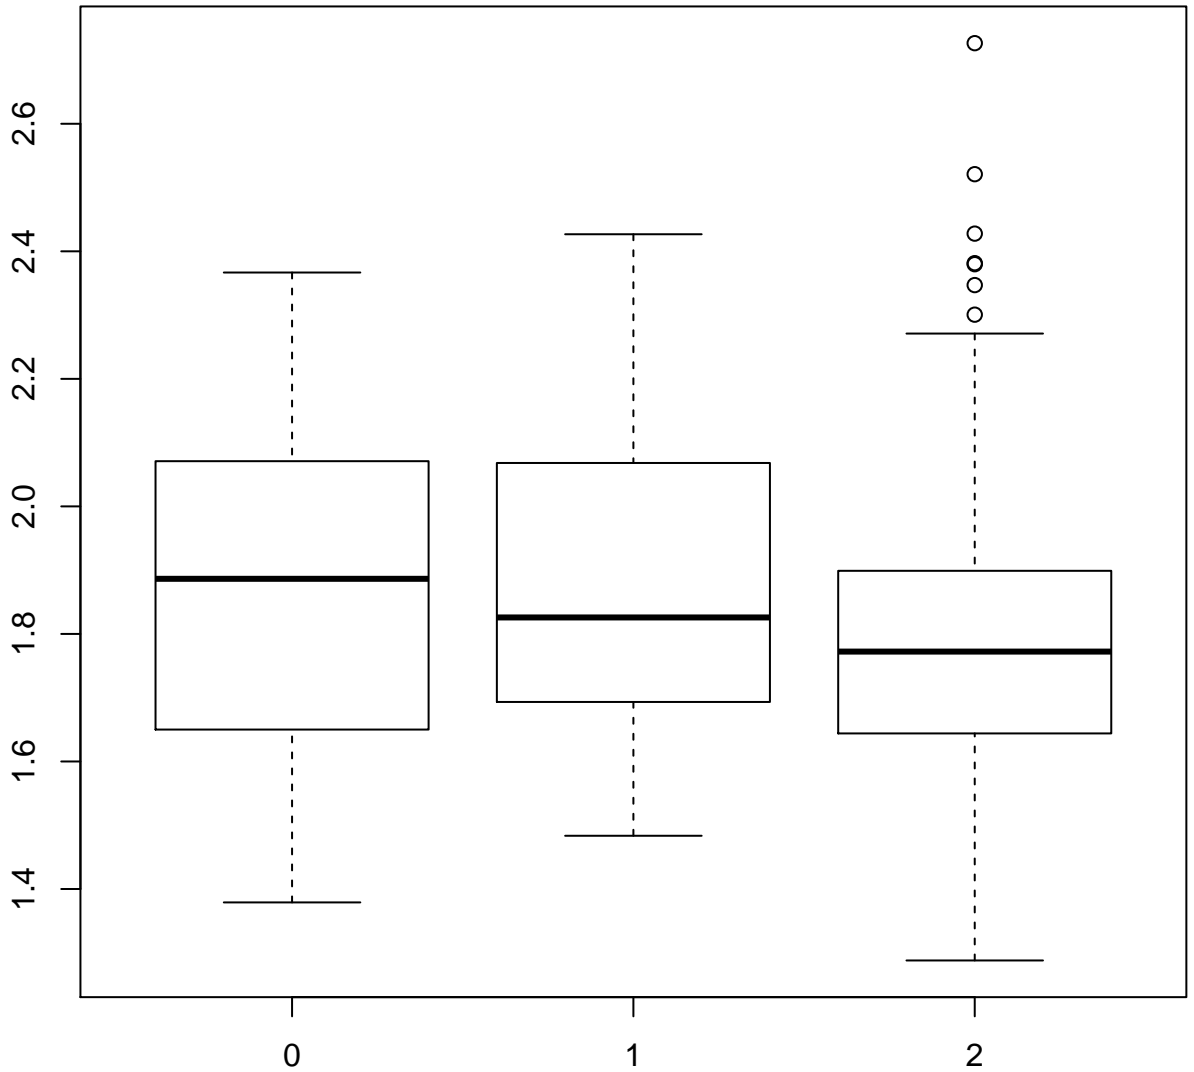

# IGF2R by rs9364554 in tumor

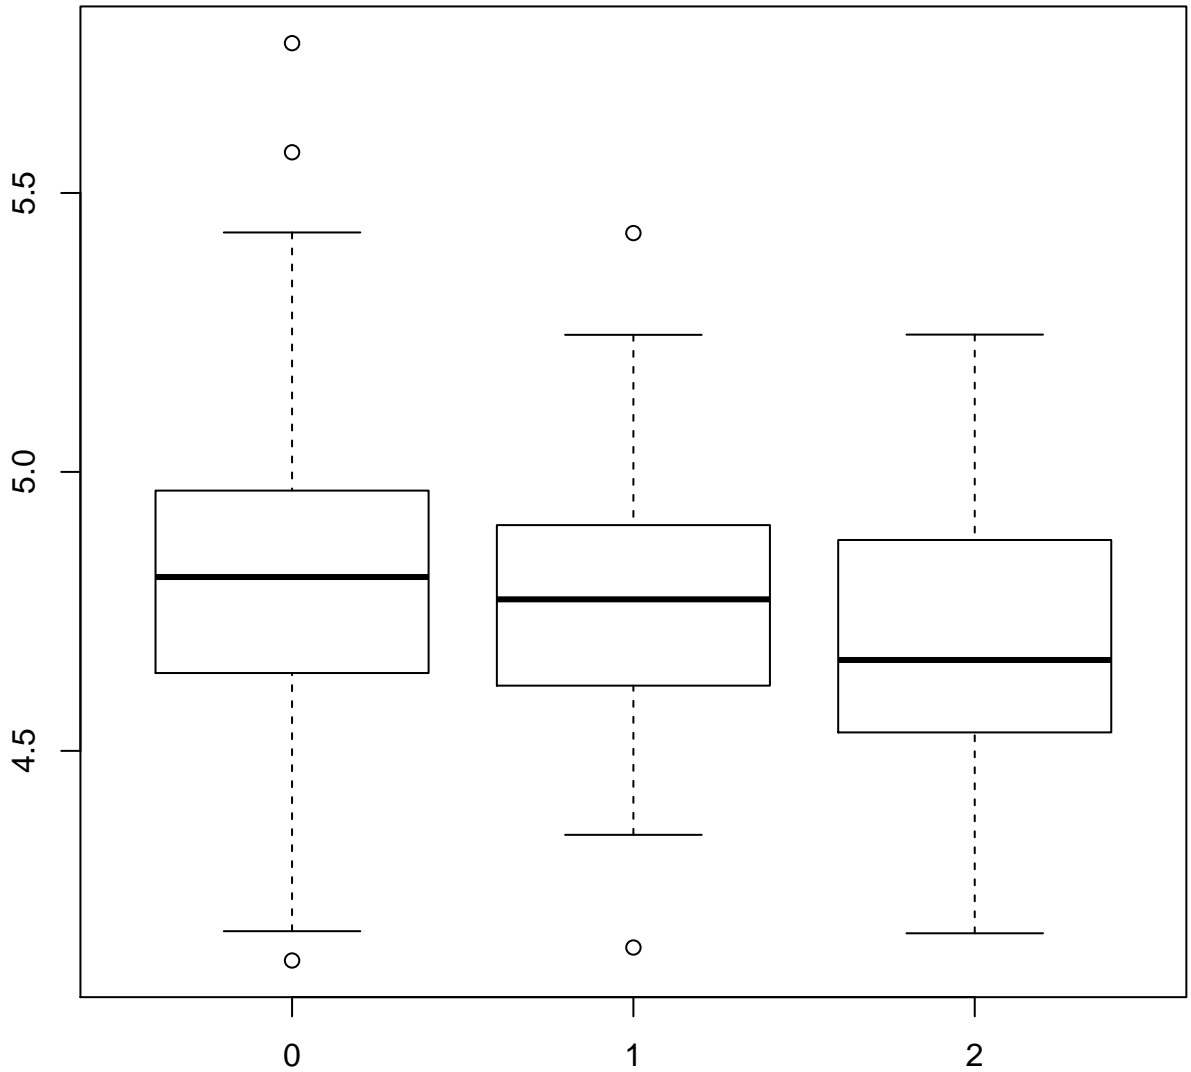

# HIBADH by rs10486567 in tumor

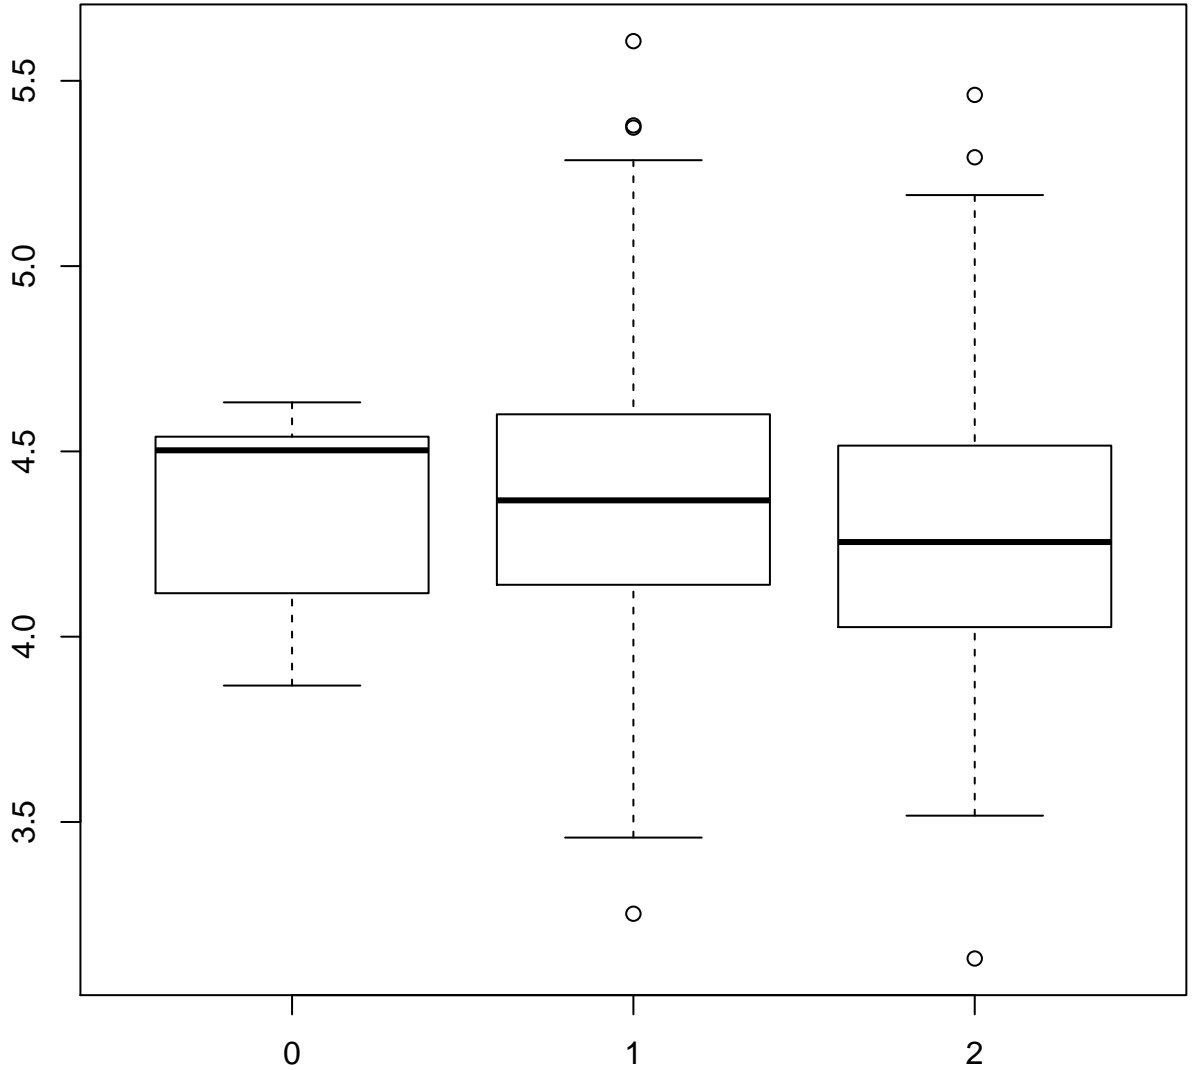

# LMTK2 by rs6465567 in tumor

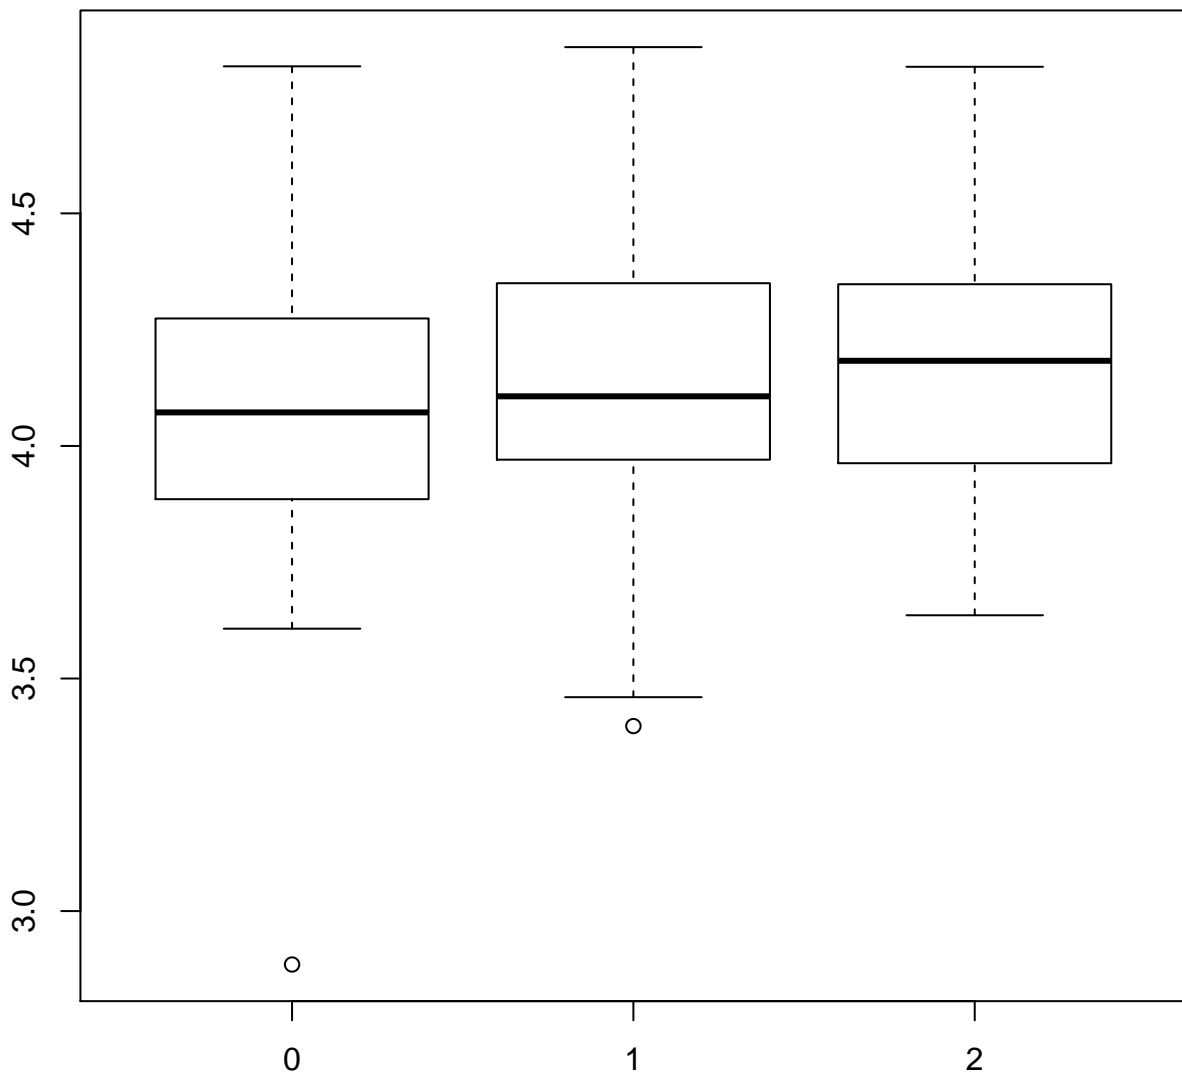

# POU5F1B by rs4242382 in tumor

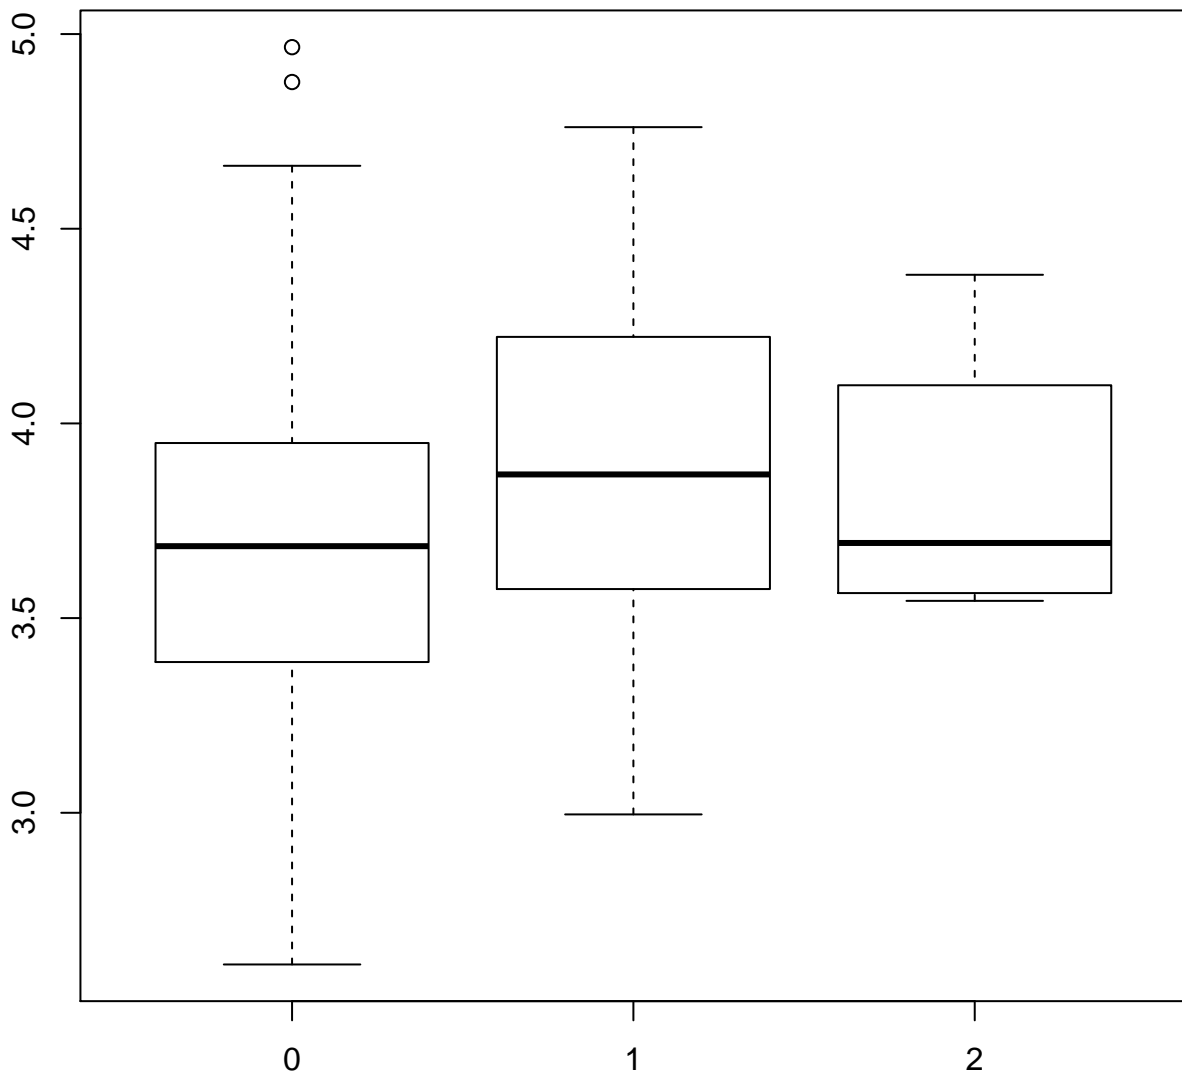

**MSMB by rs10993994 in tumor**

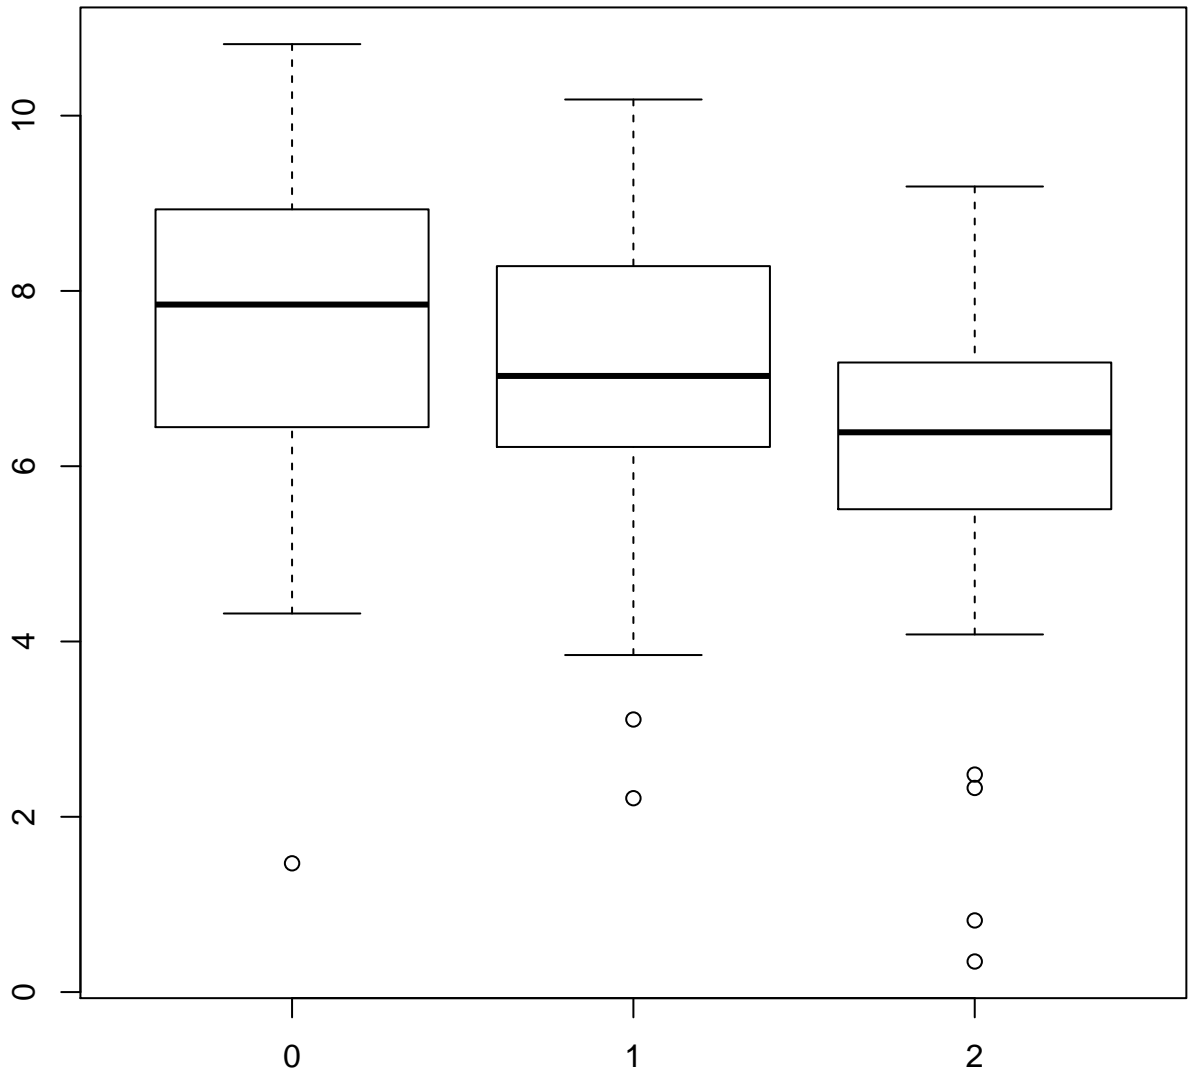

# ASAH2 by rs10993994 in tumor

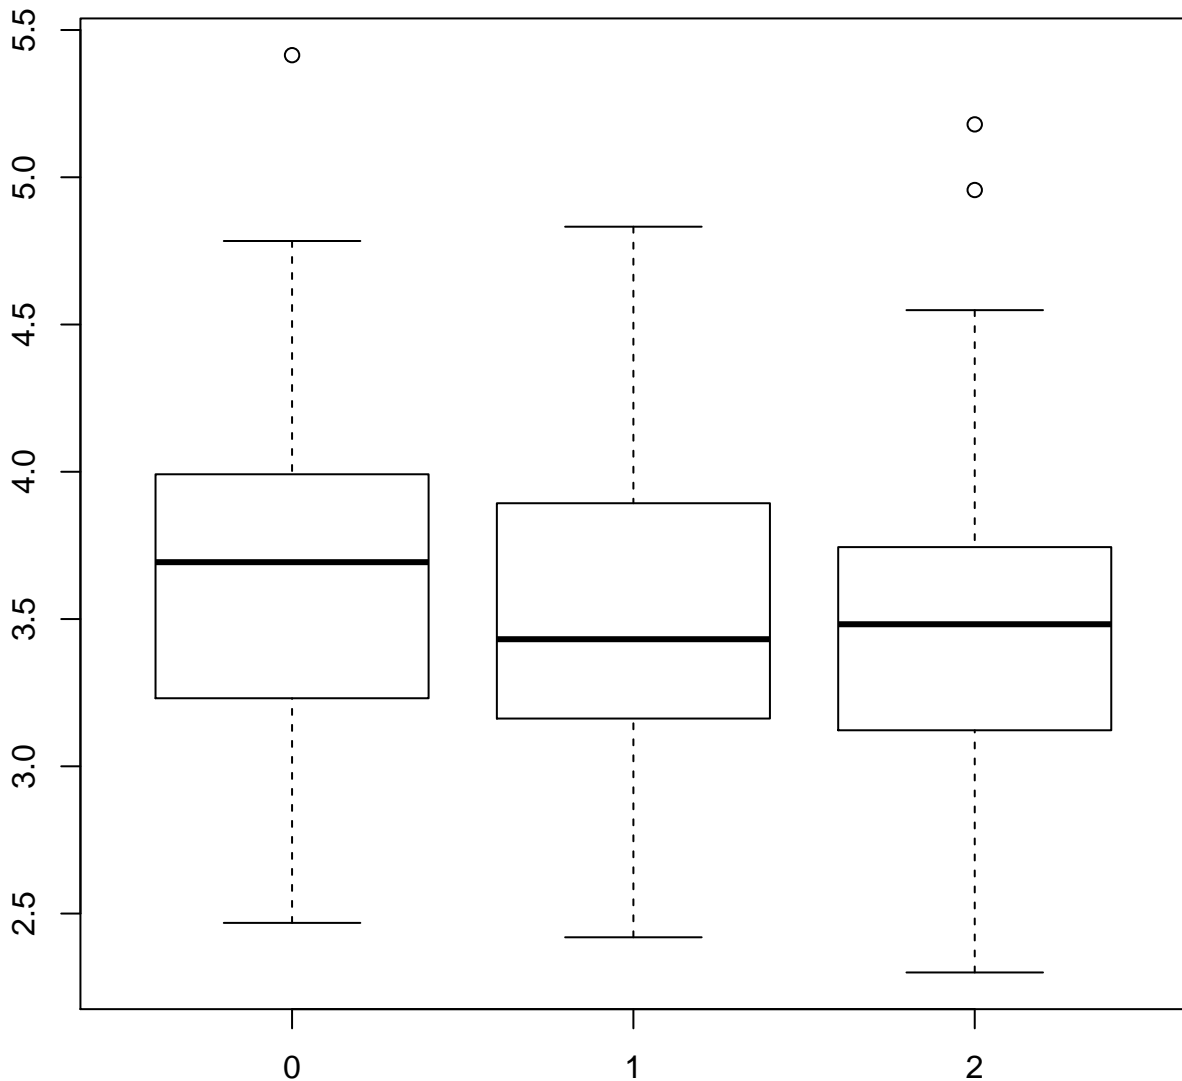



# ASCL2 by rs7127900 in tumor

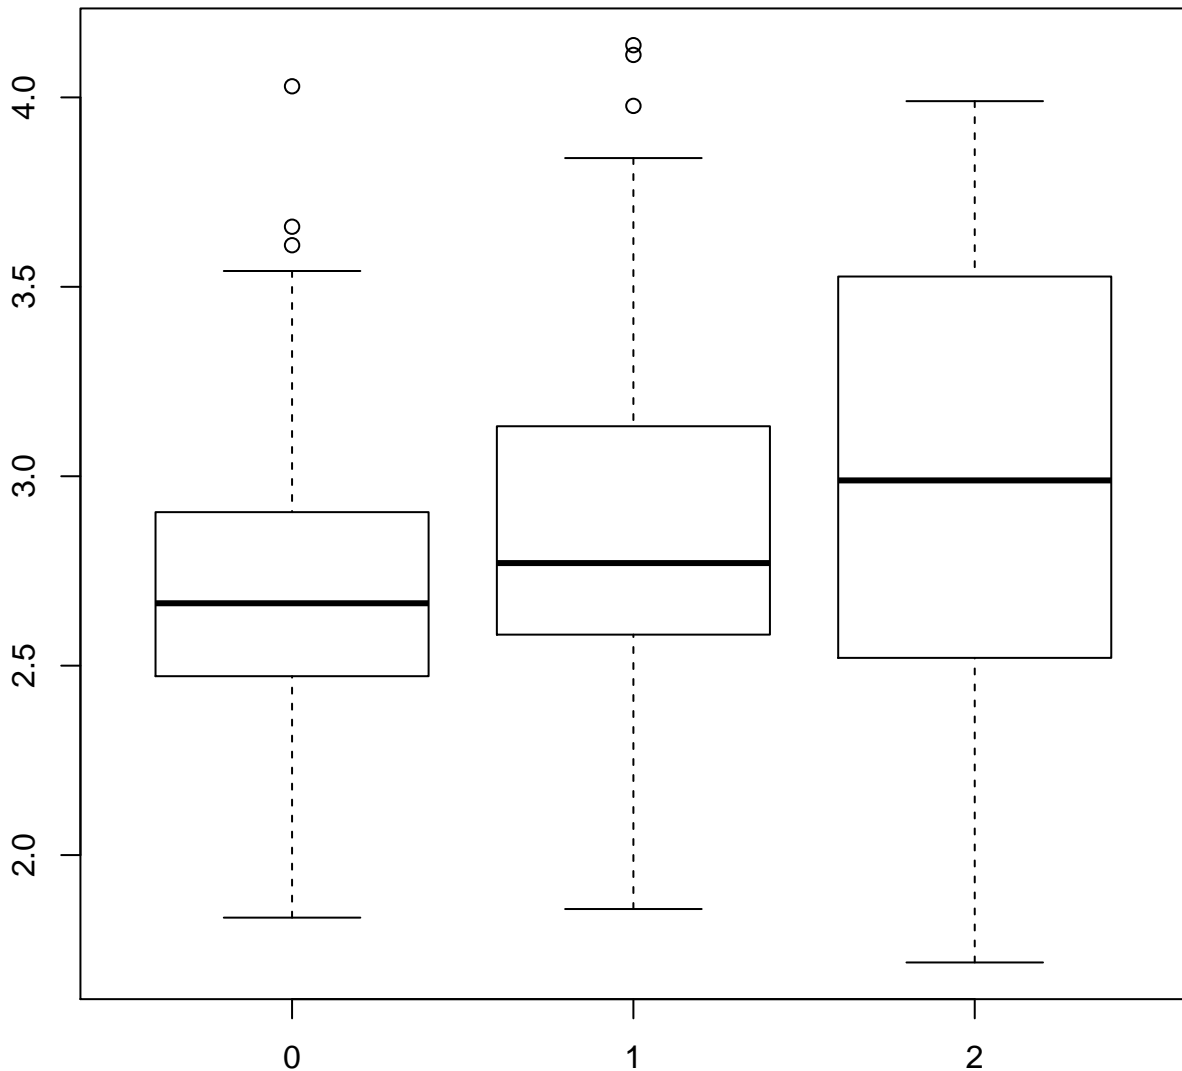

# KCNQ1 by rs7127900 in tumor

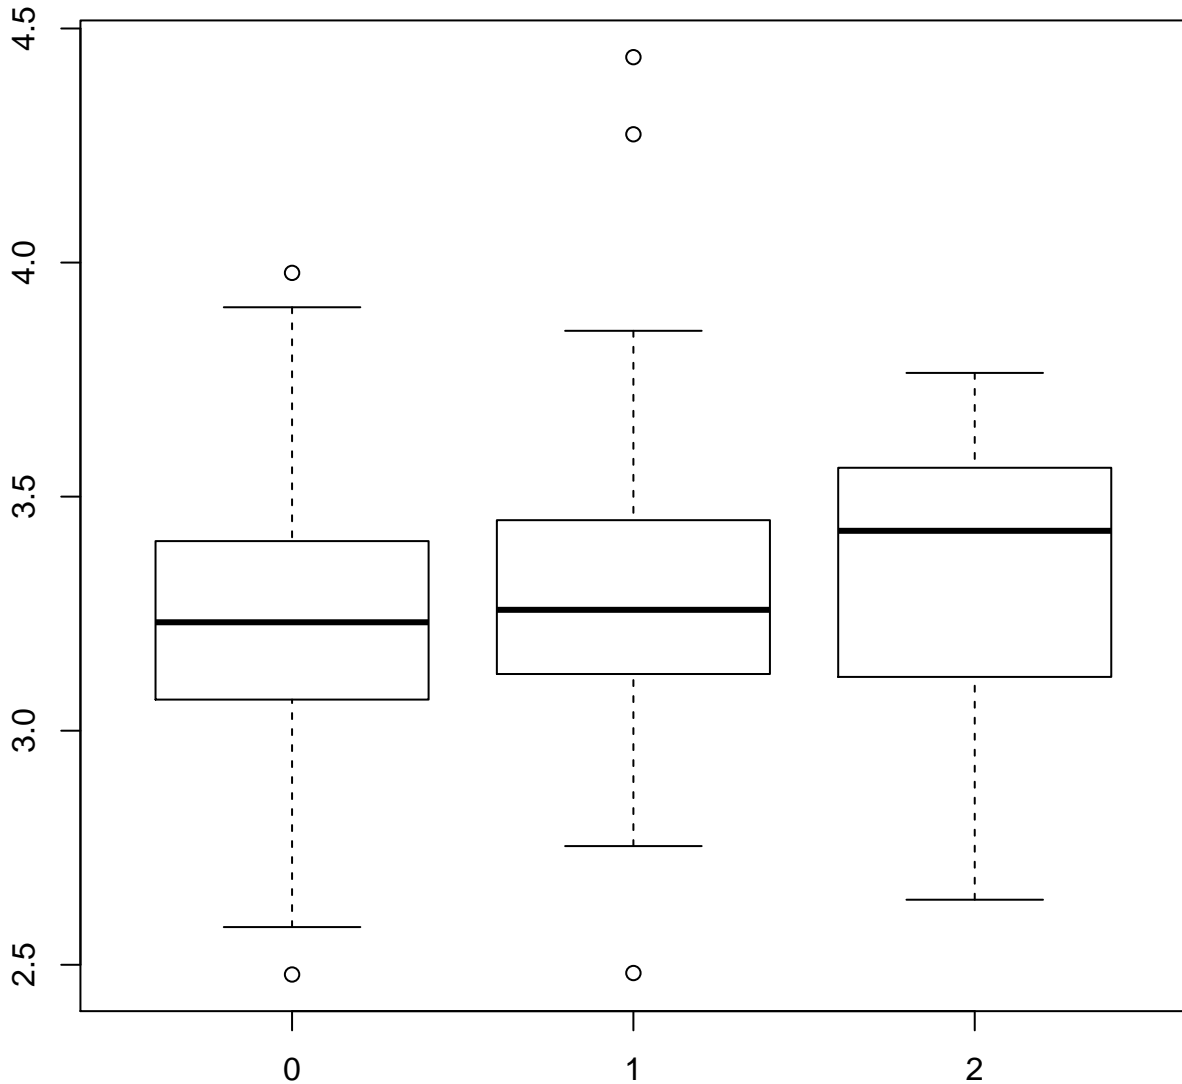

# MTL5 by rs10896449 in tumor

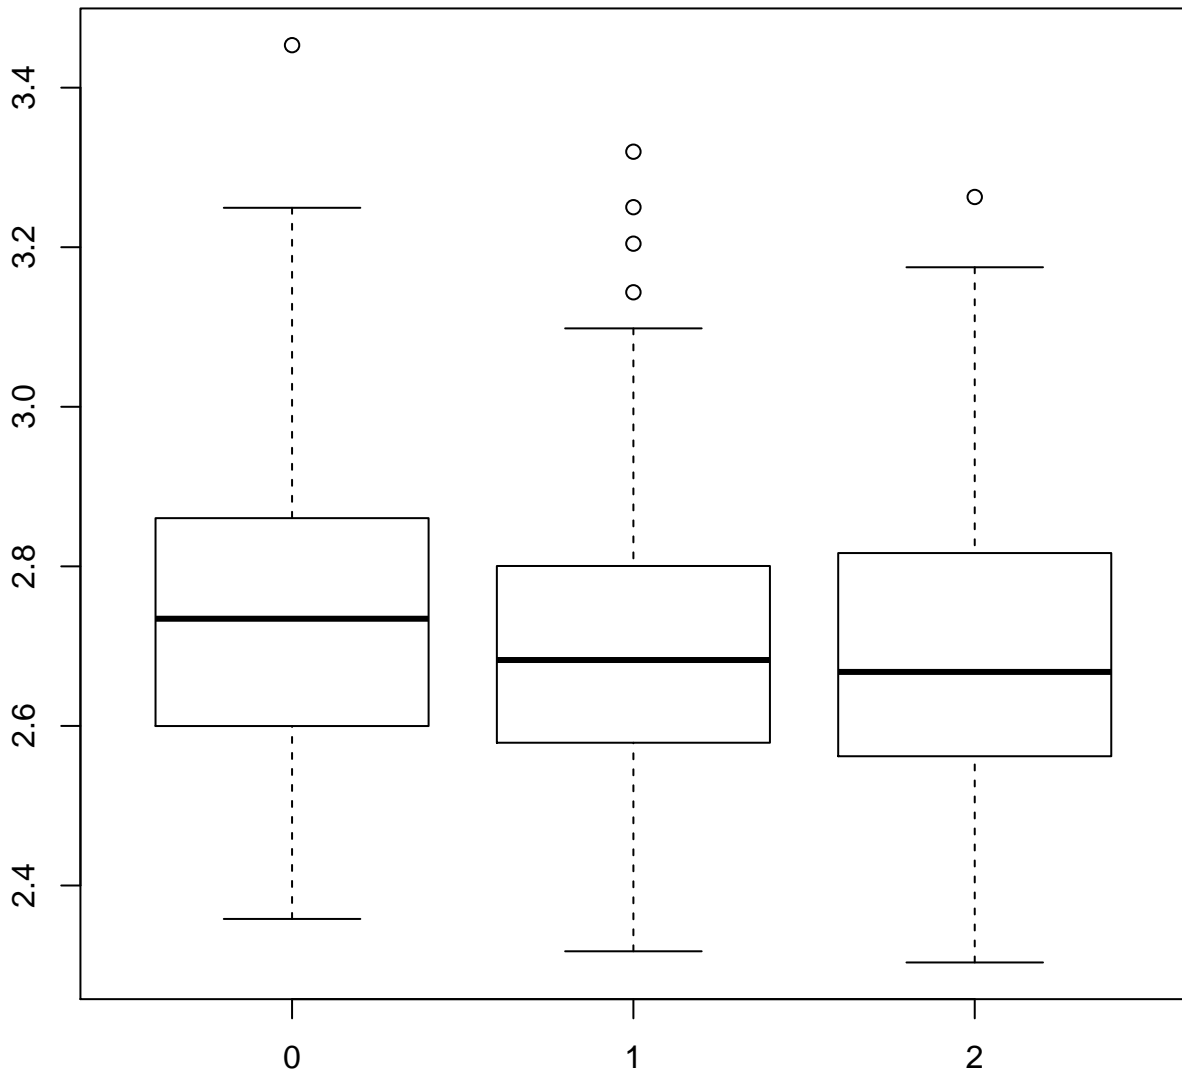

# KRT6B by rs902774 in tumor

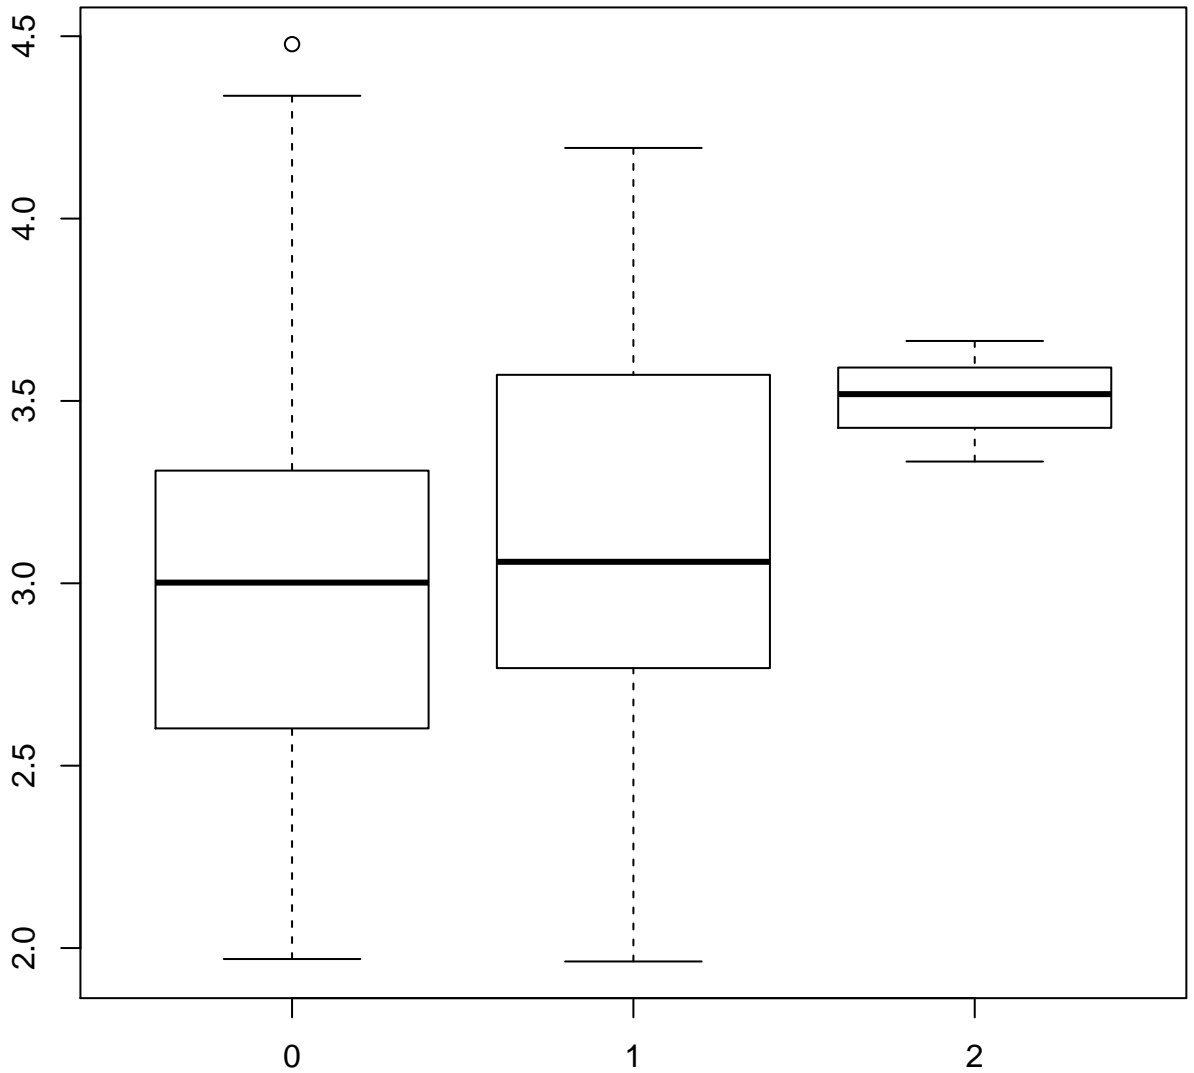

# SP7 by rs902774 in tumor

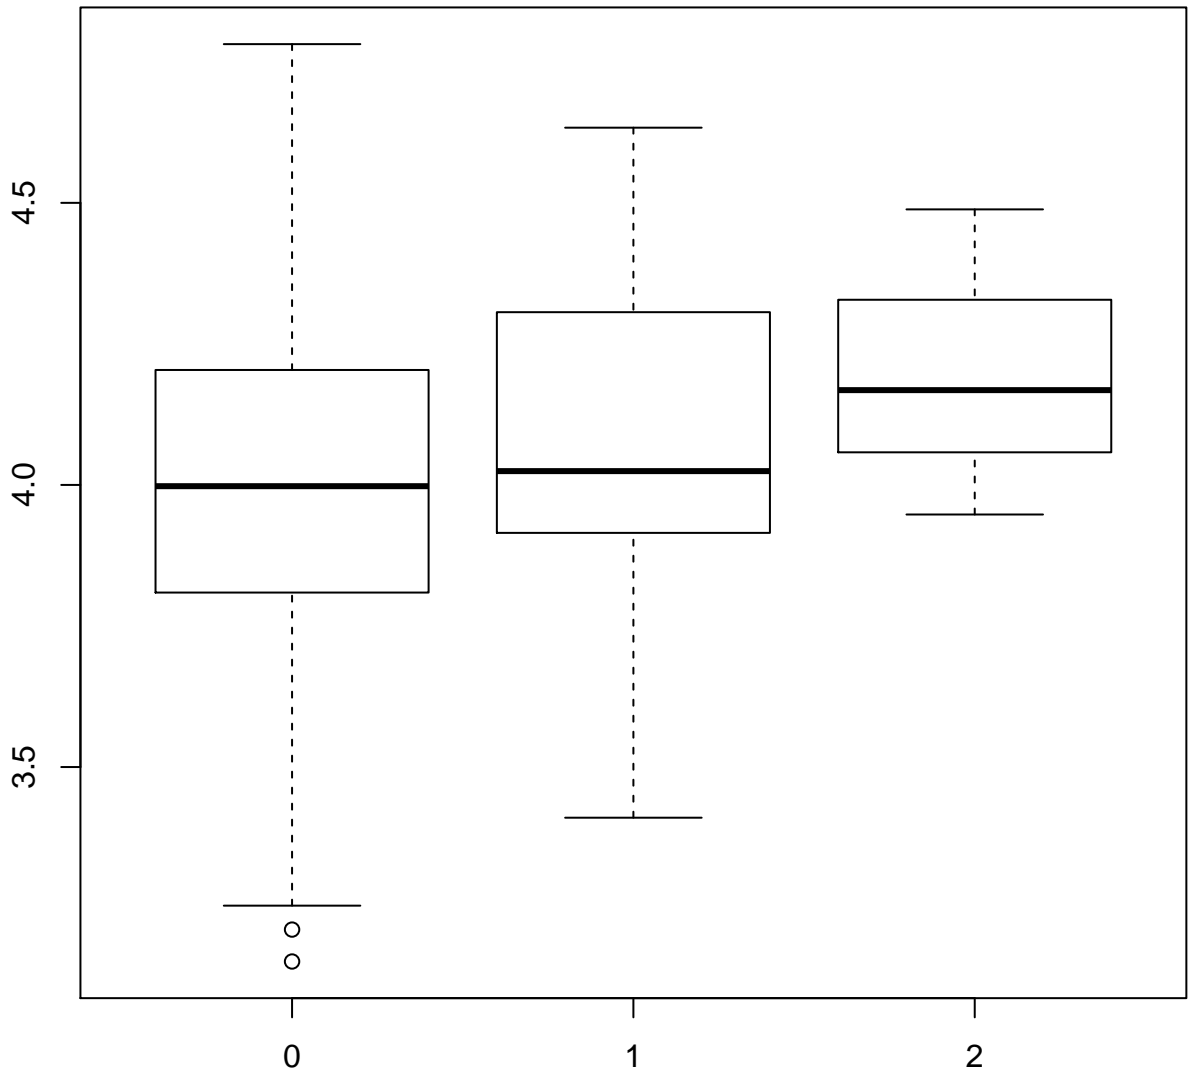

# PPP1R14A by rs8102476 in tumor

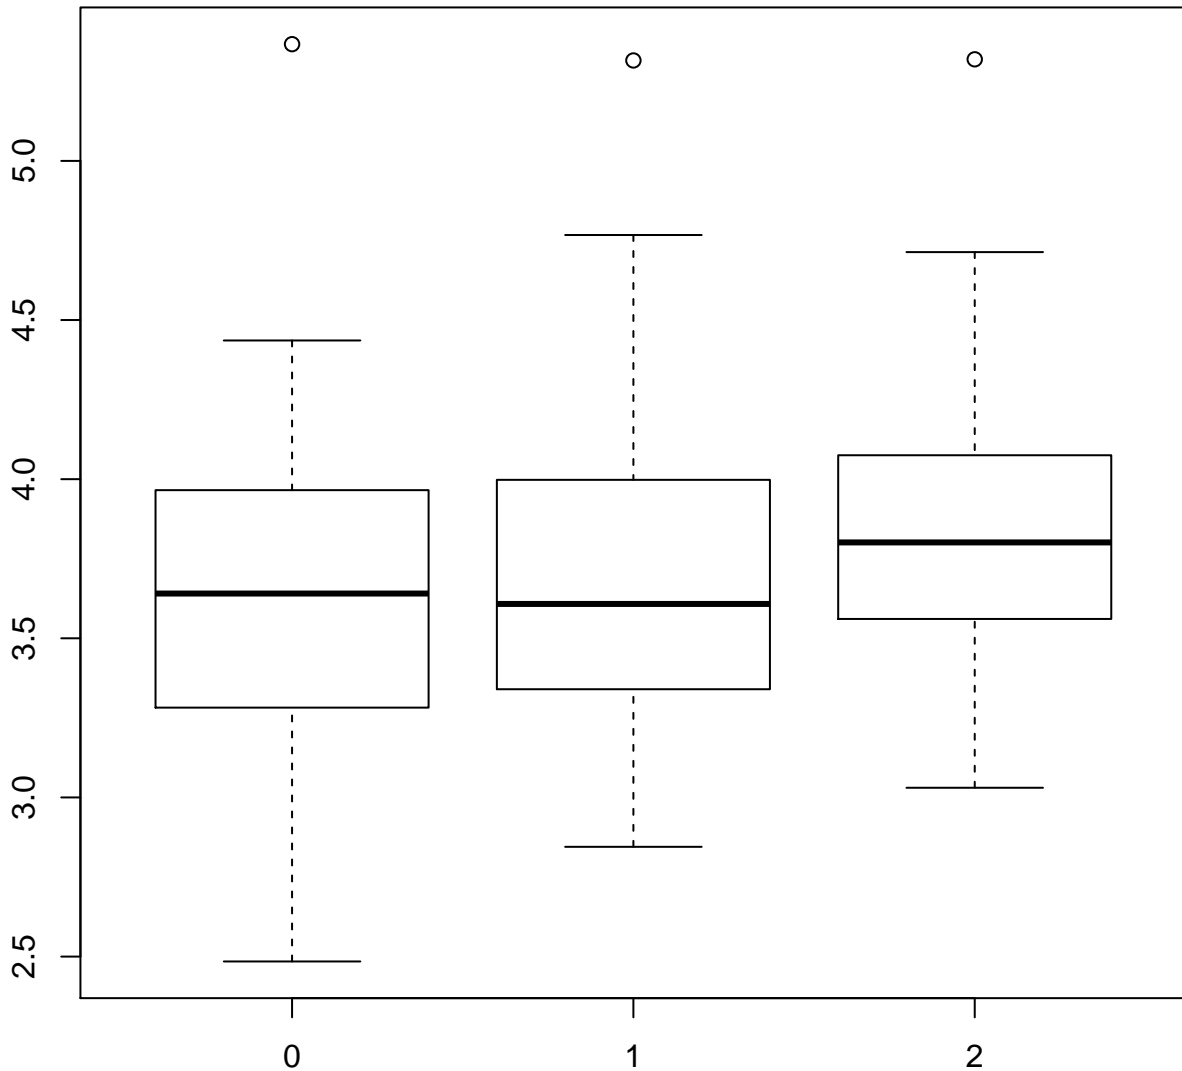

# SPINT2 by rs8102476 in tumor

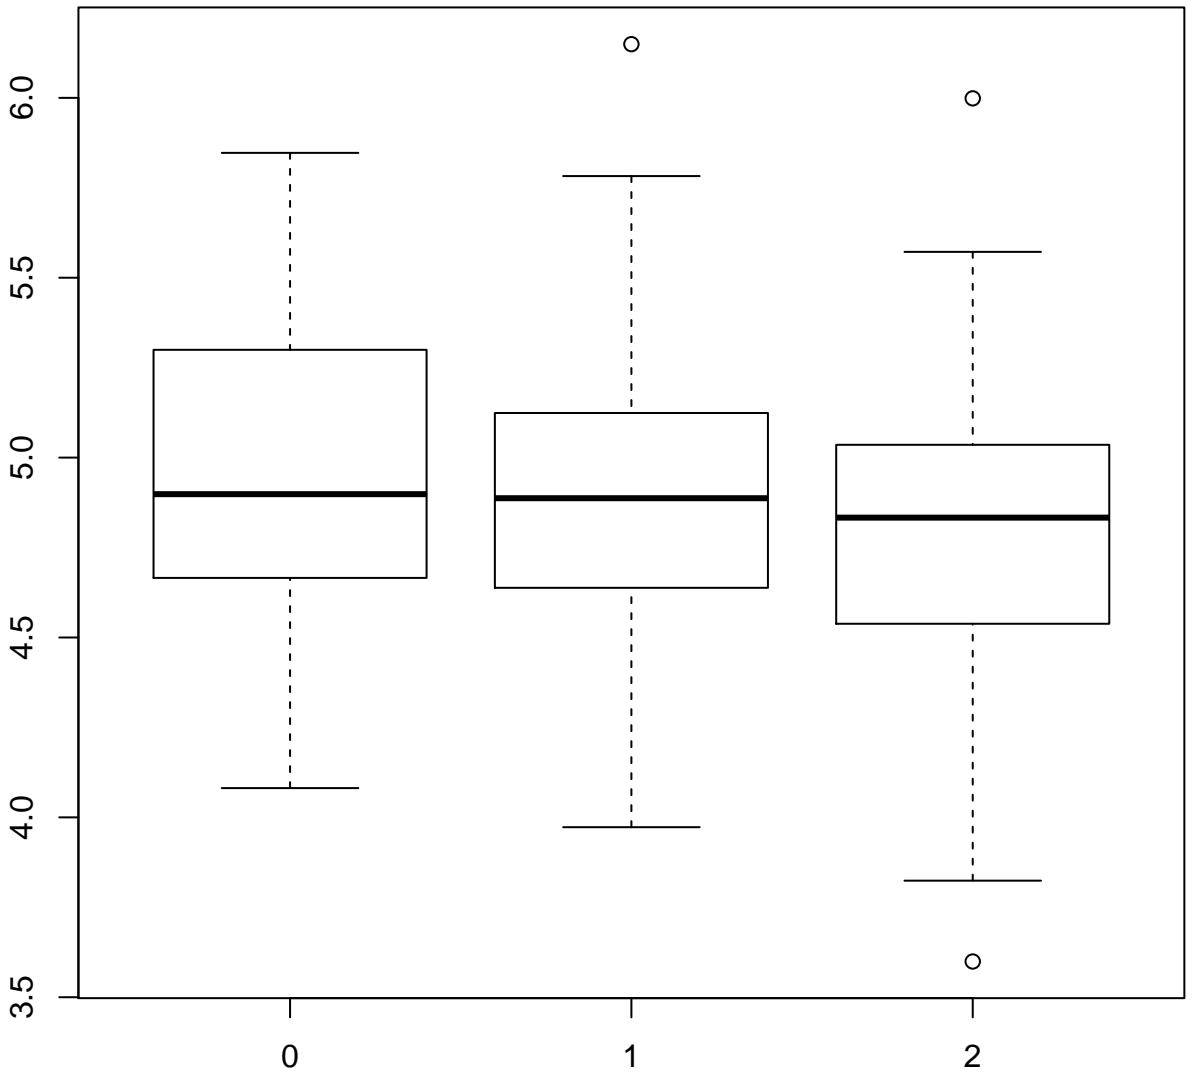

# AXL by rs11672691 in tumor

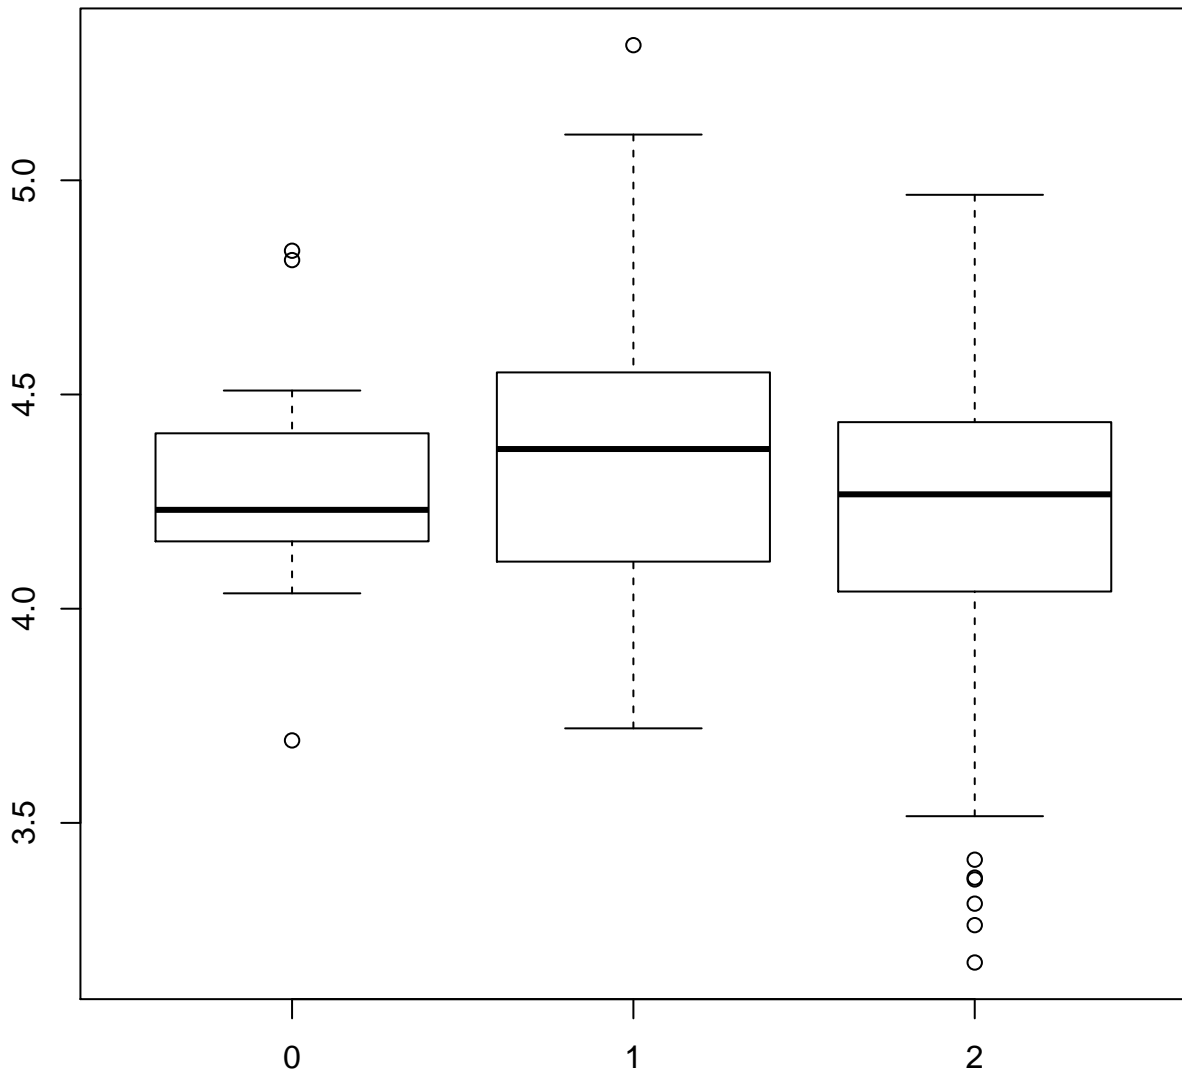



# DMRTC2 by rs11672691 in tumor

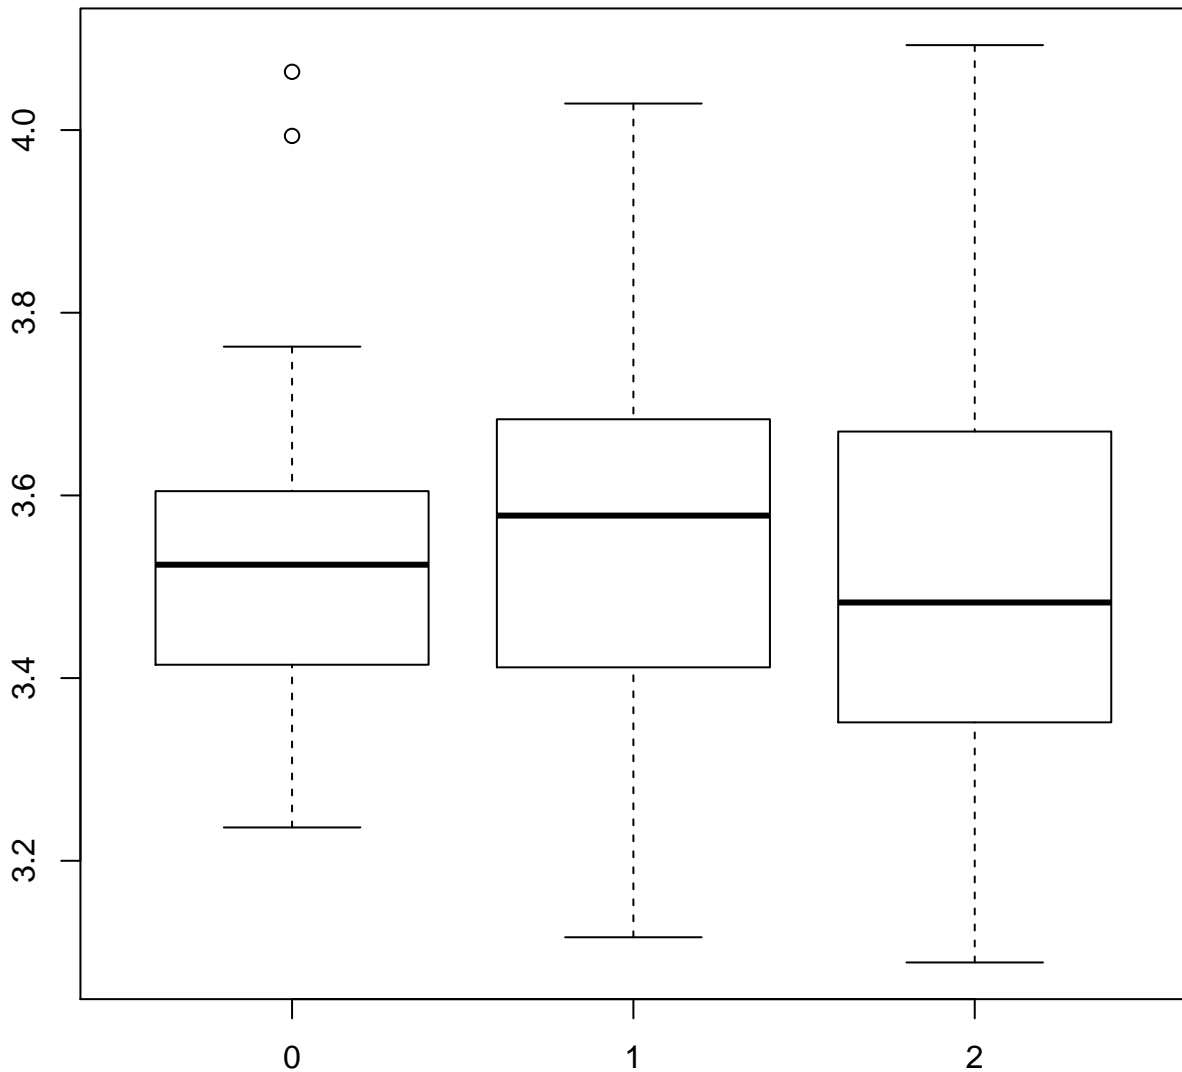

# C19orf63 by rs2735839 in tumor

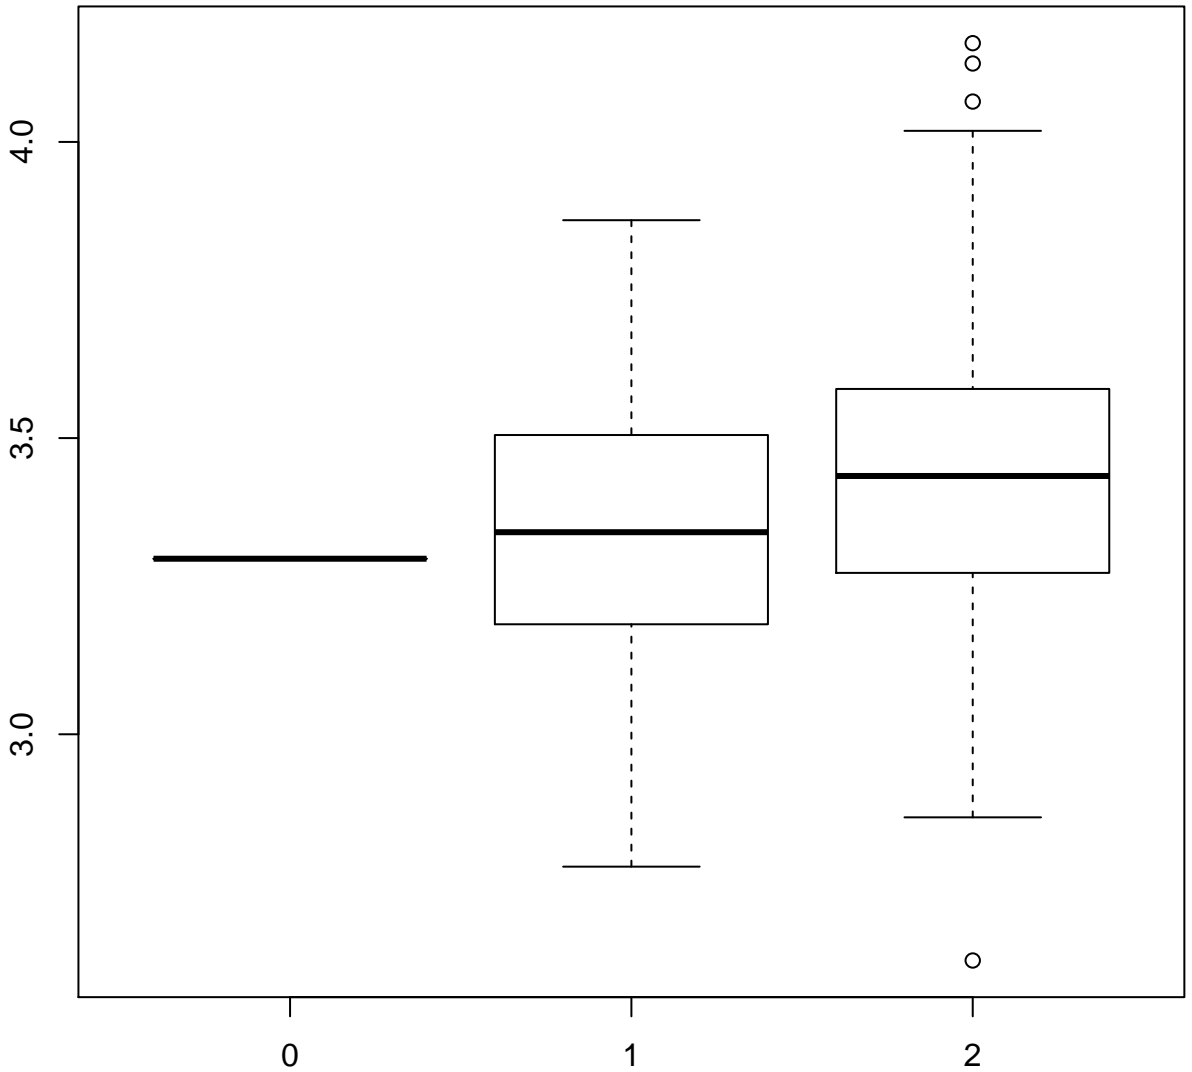

# NUDT10 by rs5945619 in tumor

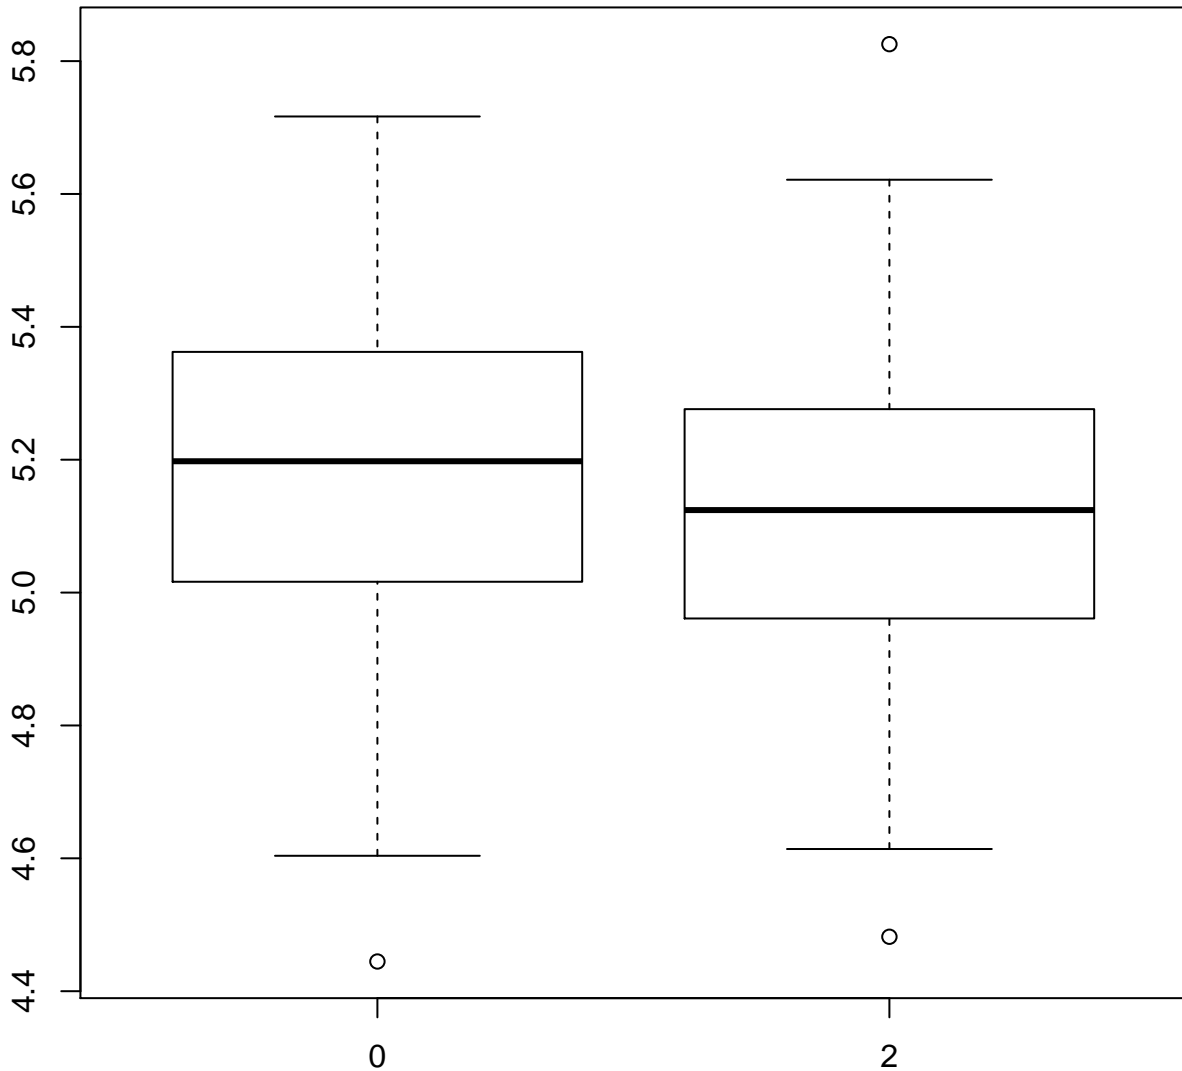

# NUDT11 by rs5945619 in tumor

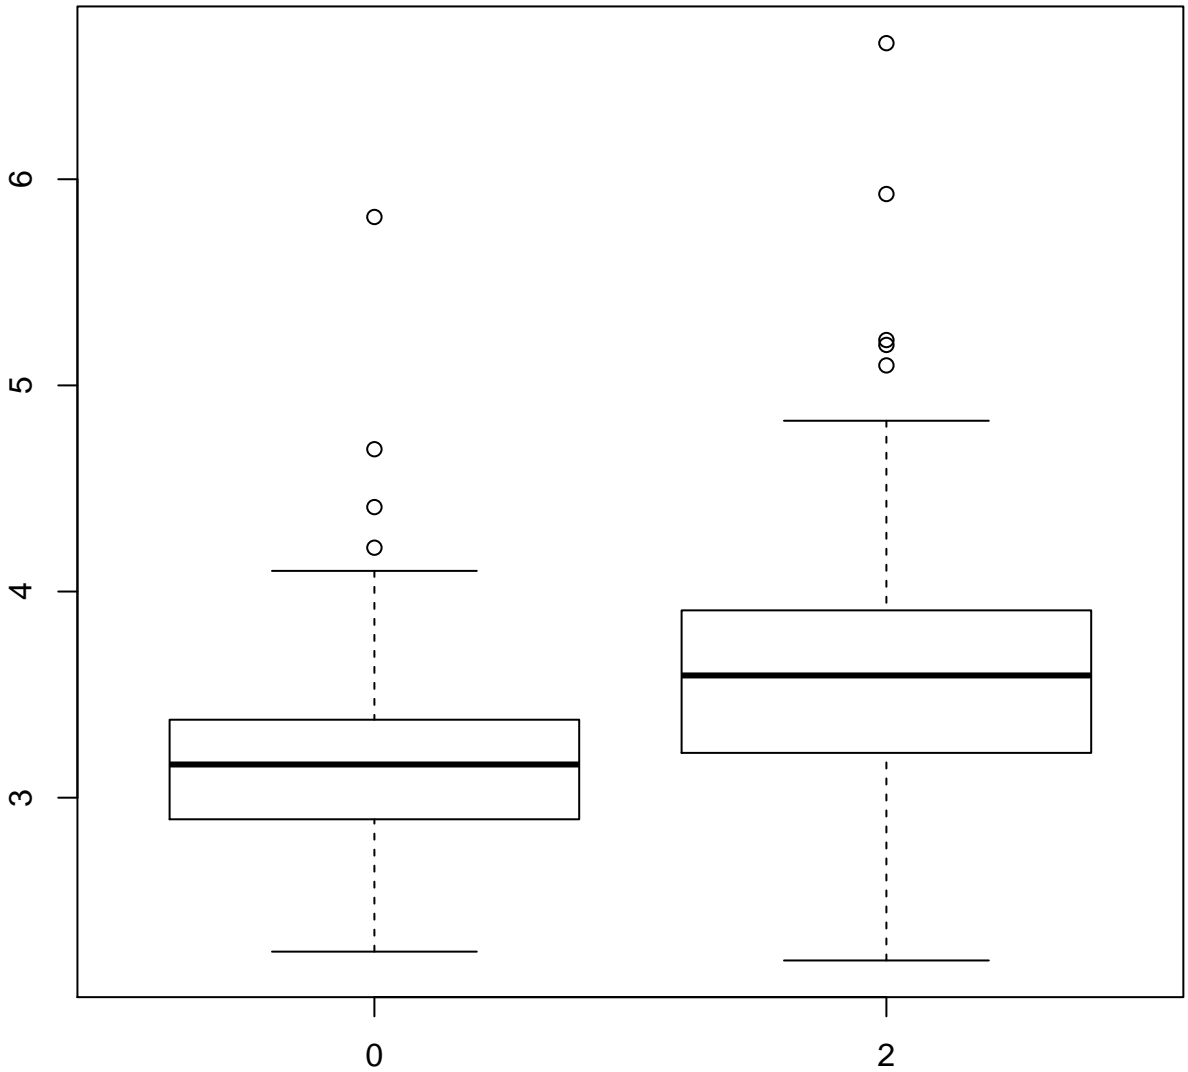

Supplement: NIHMS640861-supplement-2.pdf [file NIHMS640861-supplement-2.pdf]
